# Supplementary material for: The structure of a polygamous repressor reveals how phage-inducible chromosomal islands spread in nature
Source: PubMed Central journal article supplement (PMC6695447; doi:10.1038/s41467-019-11504-2), 2019-08-15
Supplement: 41467_2019_11504_MOESM1_ESM.pdf [file 41467_2019_11504_MOESM1_ESM.pdf]

## **Supplementary Information**

**The structure of a polygamous repressor reveals how phage-inducible chromosomal islands spread in nature.**

J. Rafael Ciges-Tomas, Christian Alite, Suzanne Humphrey, J. Donderis, Janine Bowring, Xavier Salvatella, José R Penadés, Alberto Marina.

### **Supplementary Note 1. Trimeric and dimeric Duts are structurally unrelated proteins.**

Trimeric Duts are all- $\beta$  proteins with three independent active sites formed by the contribution of five conserved motifs (named I-V), with each subunit participating in the formation of each active site present in the trimer<sup>1</sup> (Supplementary Fig. 1). Conversely, dimeric Duts are all- $\alpha$  proteins and their active centers are also generated by five conserved motifs, although the sequences of these motifs are totally different from those on trimeric Duts<sup>2,3</sup> (Supplementary Fig. 1). These differences are reflected in the alternative architectures of the corresponding active centers (Supplementary Fig. 1) and, consequently, different catalytic mechanisms for each family of Duts<sup>2,4,5</sup>.

### **Supplementary Note 2. Changes induced after BovI-Stl<sup>N-ter</sup> Dut $\phi$ 11 complex formation.**

For Dut $\phi$ 11, the free (PDB 4GV8)<sup>6</sup> and Stl-bound structures are virtually identical (RMSD of 0.16 Å for the superimposition of 161 residues) (Supplementary Fig. 6a). On the other hand, the BovI-Stl<sup>N-ter</sup> shows a small rotational movement (around 18 degrees, calculated with DynDom 3D<sup>7</sup>) between the HTH and middle domains, in which the short  $\alpha$ 6 acts as a hinge (Supplementary Fig. 6b), supporting some independence between both domains. Individual comparison of each BovI-Stl<sup>N-ter</sup> domain in the free and bound structures showed that the HTH domain (RMSD of 1.19 Å for 55 residues) suffers a higher number of local re-organizations than the middle domain (RMSD of 0.58 Å for 60 residues), which mainly affects the DNA recognition helix  $\alpha$ 3 and the following loop connecting  $\alpha$ 4 that is partially disordered. As was observed in the free structure, the first nine and the last two residues of the BovI-Stl<sup>N-ter</sup> were also disordered, indicating that the complex formation does not stabilize this part of the protein. Similarly, the fifteen C-terminal residues of Dut $\phi$ 11, which correspond to the conserved C-terminal P-loop motif V that acquires a stable conformation once the nucleotide binds the enzyme<sup>1,8</sup>, were also disordered.

### **Supplementary Note 3. Stl belongs to HTH XRE-family, permitting modelling of an Stl-DNA complex.**

DALI server<sup>9</sup> screening using BovI-Stl HTH domain as a template revealed high structural homology with several members of the HTH XRE-family like proteins (SMART accession number SM00530 or PFAM HTH\_3), for example, the 434 Cro repressor family. The superimposition of the

BovI-StI HTH domain with the corresponding HTH domains of these DNA-binding proteins (around 50 to 63 C $\alpha$ ) showed root-mean-square deviations (RMSDs) between 1.3-2.3 Å. In particular, BovI-StI HTH domain superimposed well with the bacterial restriction-modification (R-M) controller proteins (Supplementary Fig. 3a). Superimposition of the HTH domain of BovI-StI<sup>N-ter</sup> with the equivalent portion of the controller protein from the Esp1396I R-M system (C.Esp1396I) in complex with DNA (PDB 3CLC)<sup>10</sup> allowed us to generate a model of the StI bound to its target DNA. Since StI and C.Esp1396I present similar DNA binding site architecture (a 4-5 nucleotide “spacer” separating two pseudo-palindromic recognition sites)<sup>11,12</sup>, the superimposition of two BovI-StI<sup>N-ter</sup> on the equivalent HTH domains of C.Esp1396I was used to generate a biological model of StI-DNA dimer (Fig. 2a and Supplementary Fig. 3b) that revealed residues predicted to be responsible for recognition and interaction with DNA (Fig. 2b).

### **Supplementary Discussion.**

Induction of genes under the repression of several Cro family regulators, such as SinR or bacteriophage 434 CI, involves disruption of the quaternary interactions mediated by the carboxy-terminal domains<sup>13,14</sup>. Prophage induction occurs as a result of the proteolytic cleavage between their N-terminal DNA-binding and C-terminal dimerization domains<sup>13</sup>. The proteolytically separated domains cannot dimerise and no longer bind the operator DNA cooperatively. Although the de-repression of SaPI<sub>bov1</sub> is also produced by the disruption of the StI repressor dimer, in this case the mechanism is different since it is mediated by an interaction with the Dut and not by the proteolysis of the repressor. Keeping the StI repressor intact allows the process of de-repression to be transitory; repression could be reverted if the StI-Dut heterodimer was broken, opening the possibility for finely tuned regulation of this process. Our and others' results support this idea, since we have shown that the dUTP substrate acts as an inhibitor of StI binding to both dimeric and trimeric Duts, with the nucleotide being able to act as a switcher of SaPI de-repression<sup>15,16</sup>. In addition, this mechanism of repression requires weak dimers that allow quick conversion to monomers and the consequent exposure of residues involved in anti-repressor recognition. Supporting this, and in difference to the canonical Cro family repressors, the StI construct including the N-terminal and middle domains was monomeric in solution. This indicates that the middle

domain has a weak dimerization capacity that could be attributed to the high hydrophilic character of helix  $\alpha 5$ . In canonical repressors the helix  $\alpha 5$  is the main dimerization element, but in the StI the presence of the additional C-terminal domain also contributes to dimerization, compensating for the weak capacity of the middle domain. By distributing multiple weak interaction areas along its dimerization surface, StI has been able to balance its activity as repressor, which requires a stable dimeric organization, with its promiscuity in activation involving the sensing of multiple unrelated protein inducers.

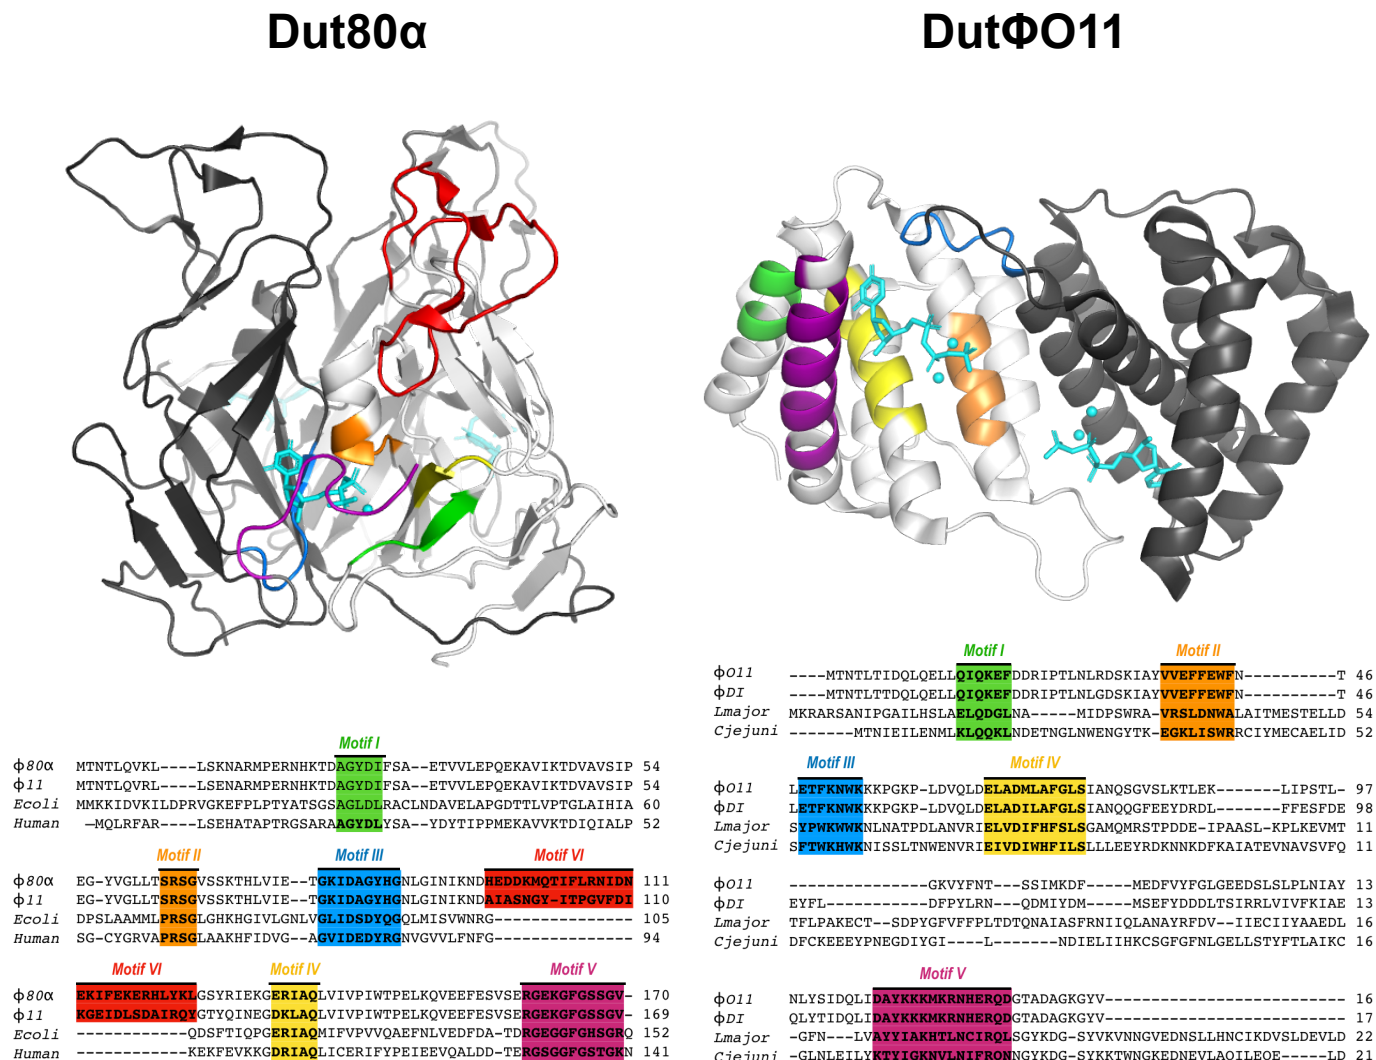

**Supplementary Figure 1. Conserved catalytic motifs in trimeric and dimeric Duts.** *Top.* The disposition of catalytic motifs of (left) trimeric and (right) dimeric Duts are highlighted on the structures of Dut80α and DutΦO11, respectively. dUTP and Mg molecules on the active sites are shown in cyan sticks and balls, respectively. *Bottom.* These motifs are also highlighted with the same colors and named in the alignment of representative Duts from *Staphylococcus aureus* phages φ80α and φ11, *Escherichia coli* and *Homo sapiens* for trimeric Duts and *S. aureus* phages φO11 and φDI, *Leishmania major* and *Campylobacter jejuni* for dimeric Duts. Note the presence of motif VI (red) characteristic of trimeric Duts encoded by *S. aureus* phages

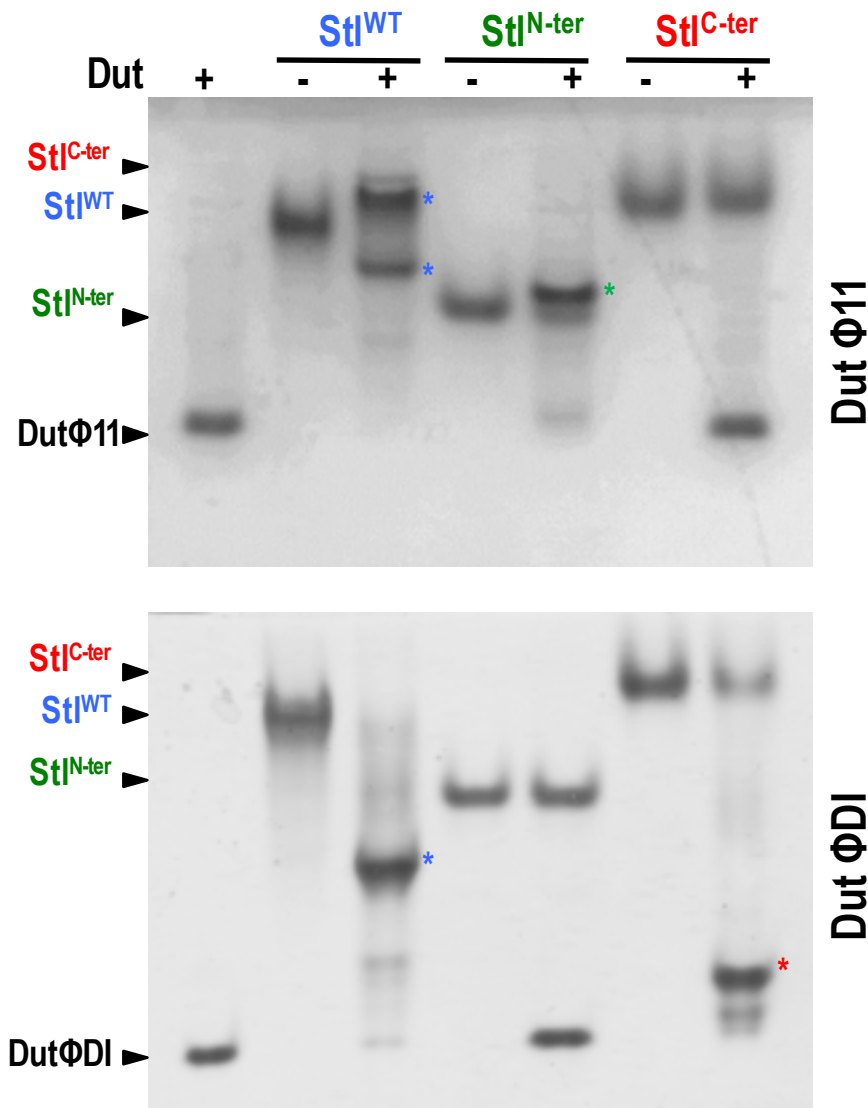

**Supplementary Figure 2. Interaction of Trimeric and Dimeric Duts with Stl and its N- and C-terminal portions.** Native-PAGE assays were used to test the interaction of the trimeric and dimeric Duts from phages  $\Phi 11$  and  $\Phi DI$ , respectively, with the full length Stl (Stl<sup>WT</sup>), as well as with the Stl N-terminal (residues 1-156, Stl<sup>N-ter</sup>) and C-terminal (residues 175-267, Stl<sup>C-ter</sup>). The appearance of a new band (denoted with an asterisk coloured as the corresponding Stl) concomitant with the disappearance of the bands corresponding to the individual proteins confirms the formation of the Stl-Dut complex. For trimeric Dut $\Phi 11$  the N-terminal portion is sufficient to form the complex, while the complex formation for dimeric Dut $\Phi DI$  requires the C-terminal portion. Source data are provided as a Source Data file.

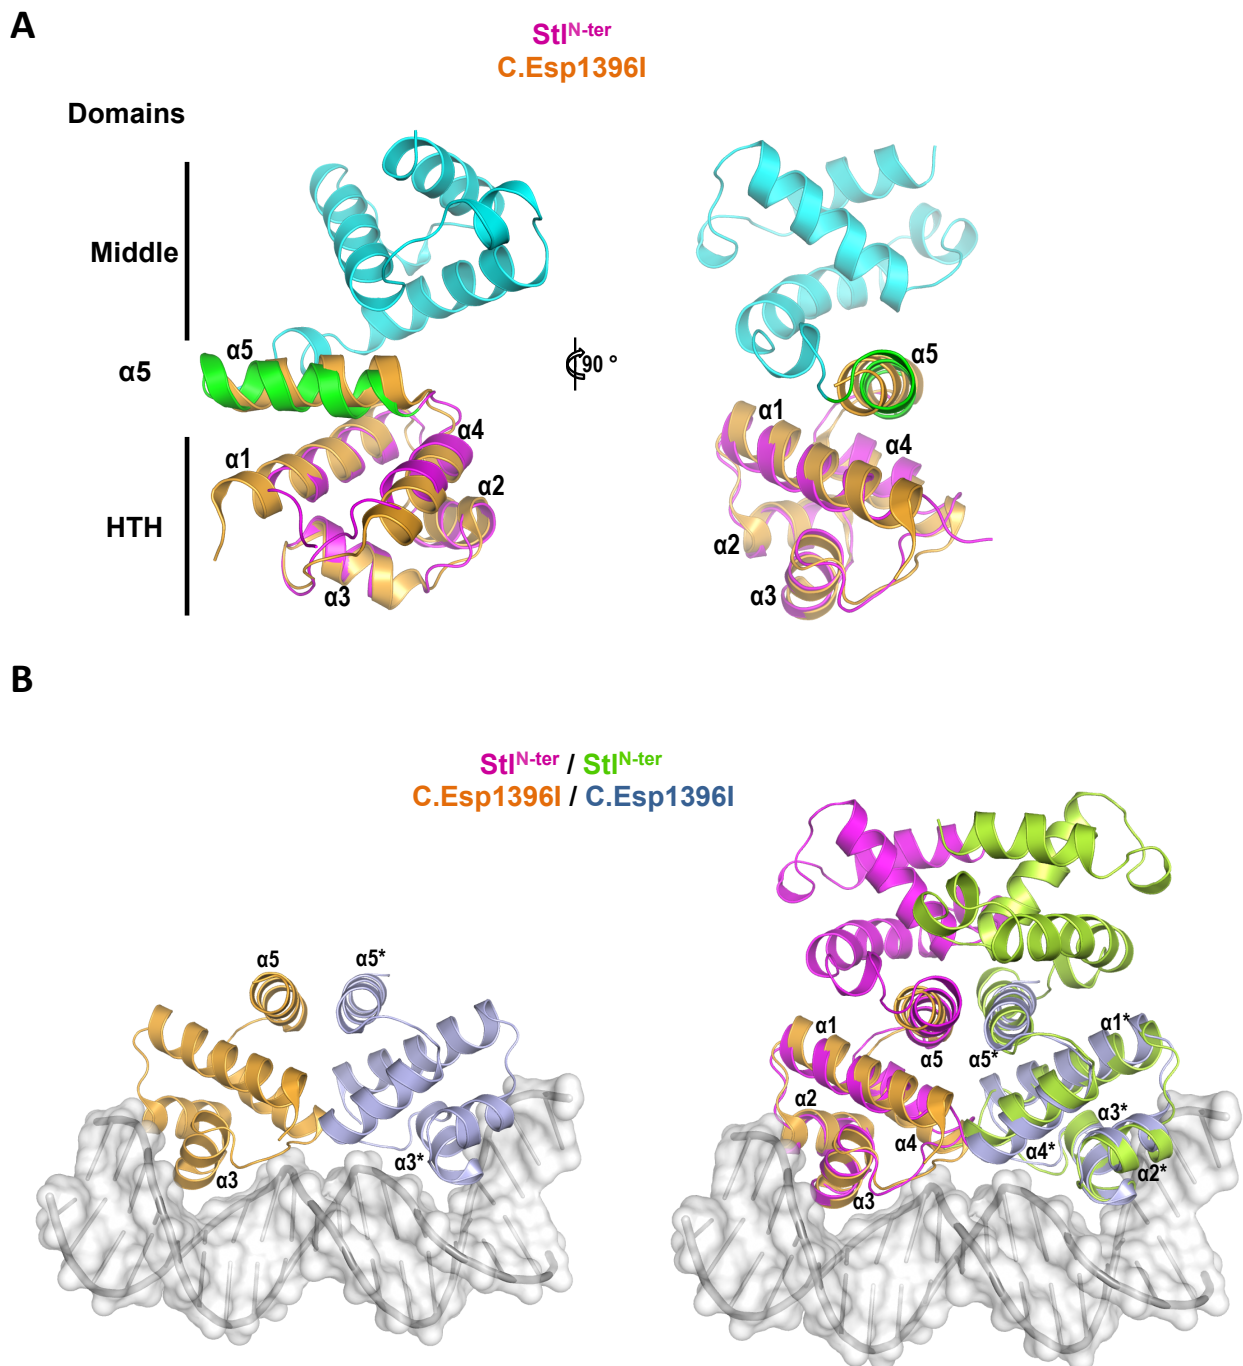

**Supplementary Figure 3. Comparison of the structure of Stl with the controller C-Esp1396I.**

(A) The superimposition of Stl<sup>N-ter</sup> and C.Esp1396I (PDB 3CLC<sup>10</sup>), the controller protein of the restriction-modification system Esp1396I, shows that the structural identity between both proteins not only includes the HTH DNA-binding domains (purple and orange for Stl and C.Esp1396I, respectively) but also the following helix  $\alpha 5$  (green in Stl), which is used in Stl to connect the HTH with the middle domain (cyan). Both proteins are represented in ribbon and two orthogonal views are shown. The  $\alpha$  helices composing the HTH domain are labelled. (B) *left*, the structure of the dimeric C.Esp1396I (protomers in orange and blue) bound to DNA ((white) PDB 3CLC) was used to generate a model of Stl<sup>N-ter</sup>-DNA by superimposing two monomers (magenta and green) onto the equivalent regions of C.Esp1396I (*right*). The common structural elements are numbered and labelled. The asterisks denote the elements of the second protomer.

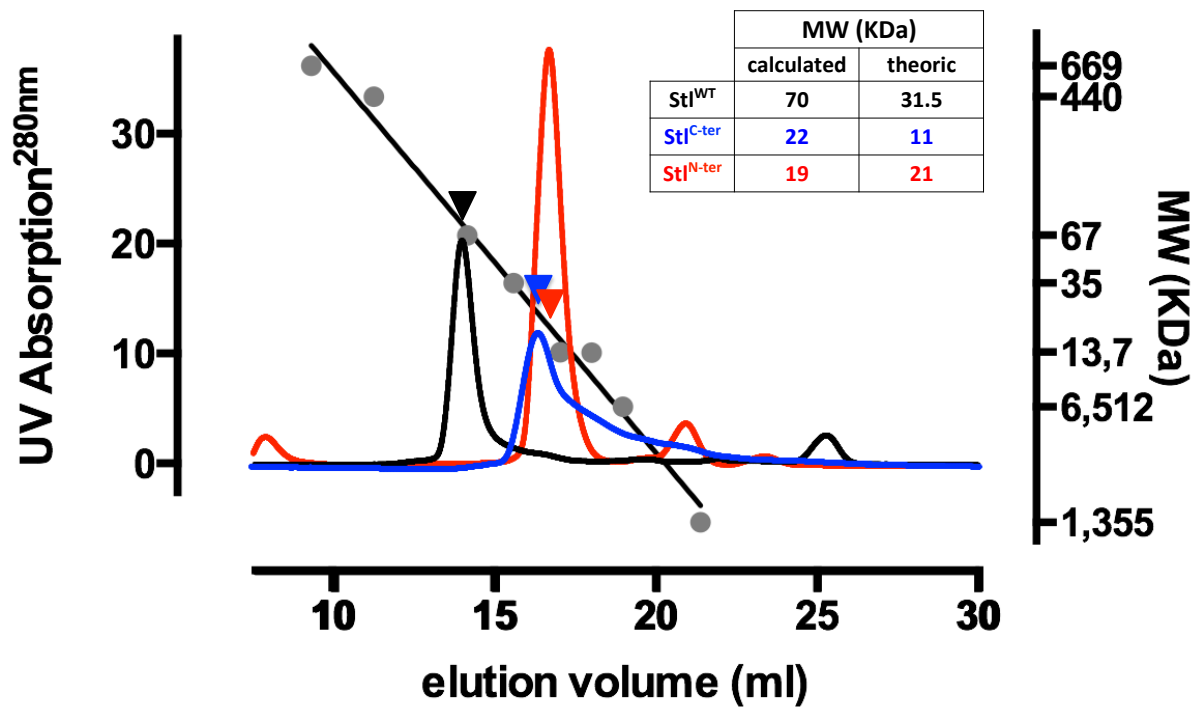

**Supplementary Figure 4. Size exclusion chromatography of Stl<sup>WT</sup>, Stl<sup>N-ter</sup> and Stl<sup>C-ter</sup>.** Elution profiles of the proteins were monitored as UV absorption (black, red and blue curves) and plotted semilogarithmically (black, blue and red triangles) together with the elution positions of molecular mass standards (gray circles). The molecular weight was deduced from the elution volumes (inset) and supports a dimeric organization for Stl<sup>WT</sup> and Stl<sup>C-ter</sup> and monomeric for Stl<sup>N-ter</sup>. Source data are provided as a Source Data file.



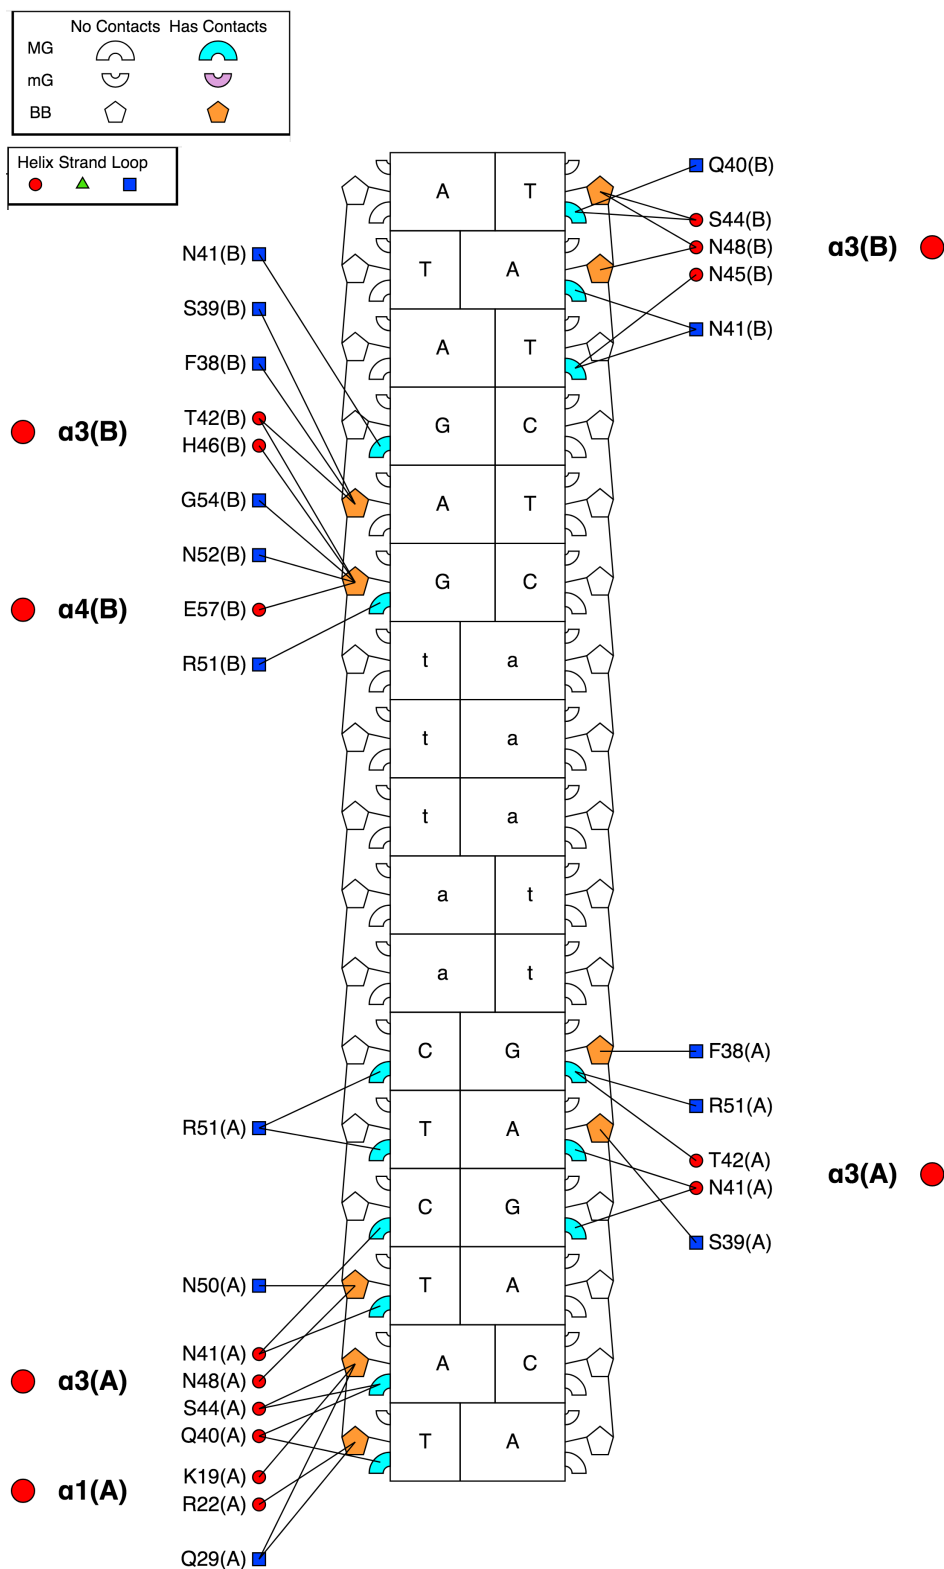

**Supplementary Figure 5. Nucleotide-residue contact map.** Schematic representation from DNAProDB<sup>17</sup> showing the individual protein-nucleotide interactions observed in the StI-DNA model. The StI palindromic DNA recognition sequence (TATCTC) is highlighted in capital letters. Specific read-out through major groove (MG) interactions are highlighted in large markers filled-in cyan while nonspecific interactions with the DNA backbone (BB) are highlighted with pentagons filled-in orange. Protein helices and loop residues are depicted in red circles and blue squares, respectively.

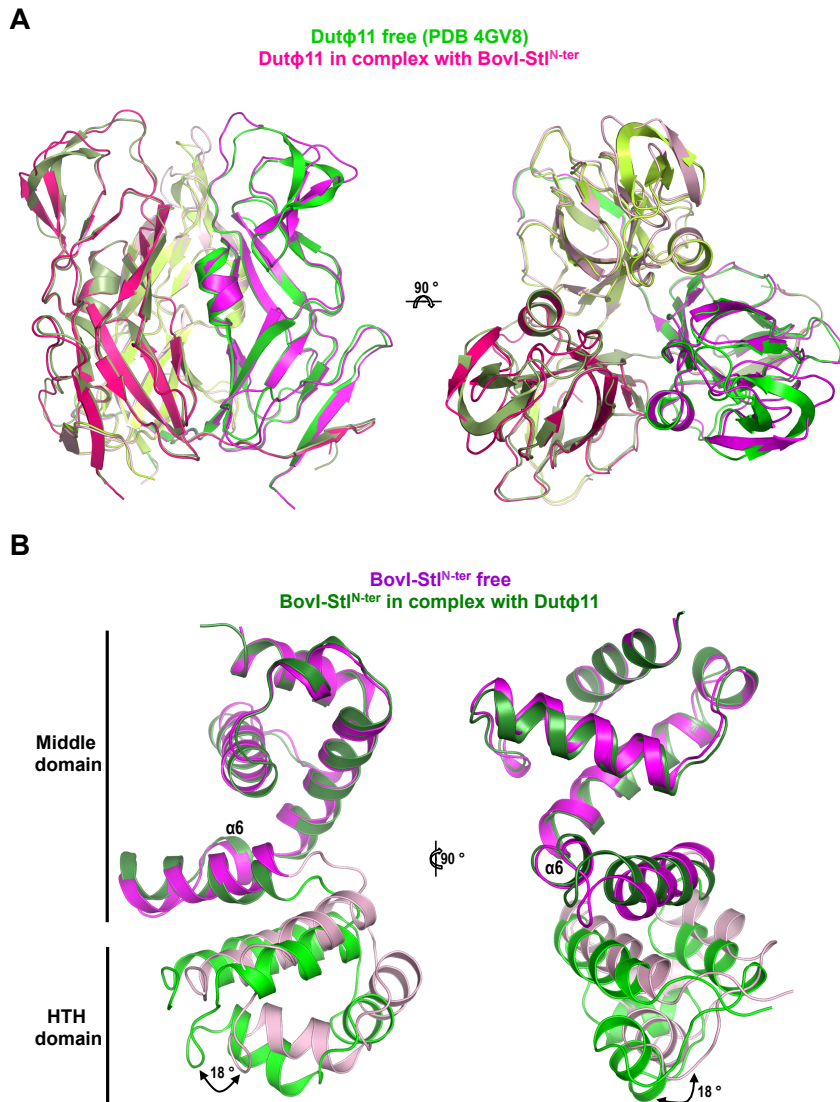

**Supplementary Figure 6. Conformational changes in BovI-Stl<sup>N-ter</sup> and Dut $\phi$ 11 induced by complex formation.** (A) The crystal structures of the trimer of Dut $\phi$ 11 both in complex with BovI-Stl<sup>N-ter</sup> and in free form were overlaid, and two orthogonal views in cartoon representation are displayed, with the protomers of the free form in different tones of green and the protomers of the Dut in complex with BovI-Stl<sup>N-ter</sup> in different tones of magenta. (B) The structures of BovI-Stl<sup>N-ter</sup> obtained in its free form (green) or in complex with Dut $\phi$ 11 (magenta) were overlaid and two orthogonal views are shown in cartoon representation. The HTH domain is coloured in a lighter tone.

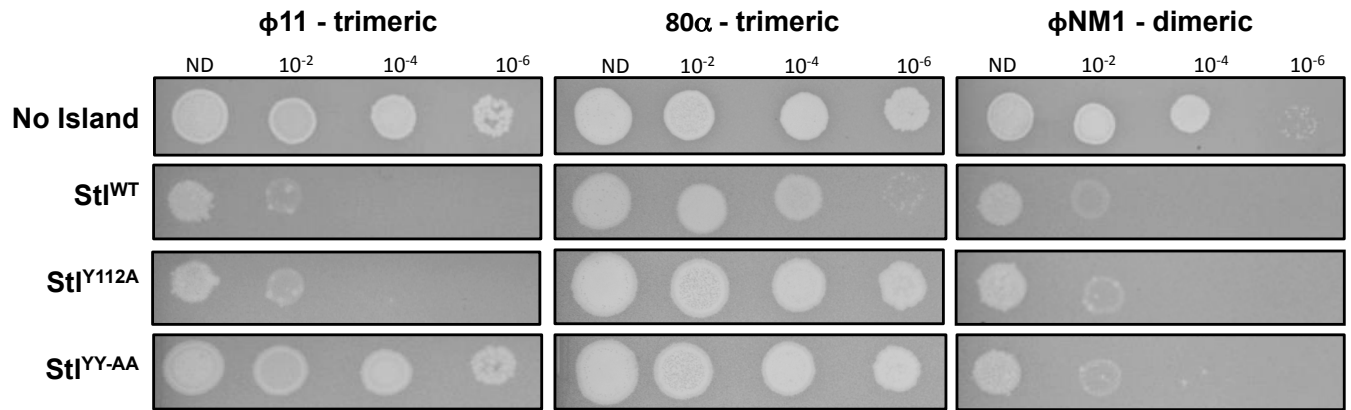

**Supplementary Figure 7.** Phage spotting assay using the trimeric Dut encoding phages  $\phi 11$  and  $80\alpha$ , and dimeric Dut encoding  $\phi NM1$  on bacterial lawns of RN4220 strains either without any SaPI, with the SaPI<sub>bov1</sub> StI<sup>WT</sup>, or with SaPI<sub>bov1</sub> mutants StI<sup>Y112A</sup> or StI<sup>YY-AA</sup>. Serially diluted (10-fold) lysates were spotted on the lawns of indicated *S. aureus*. The phage titre (PFU/ml) used for each spot is indicated. Source data are provided as a Source Data file.

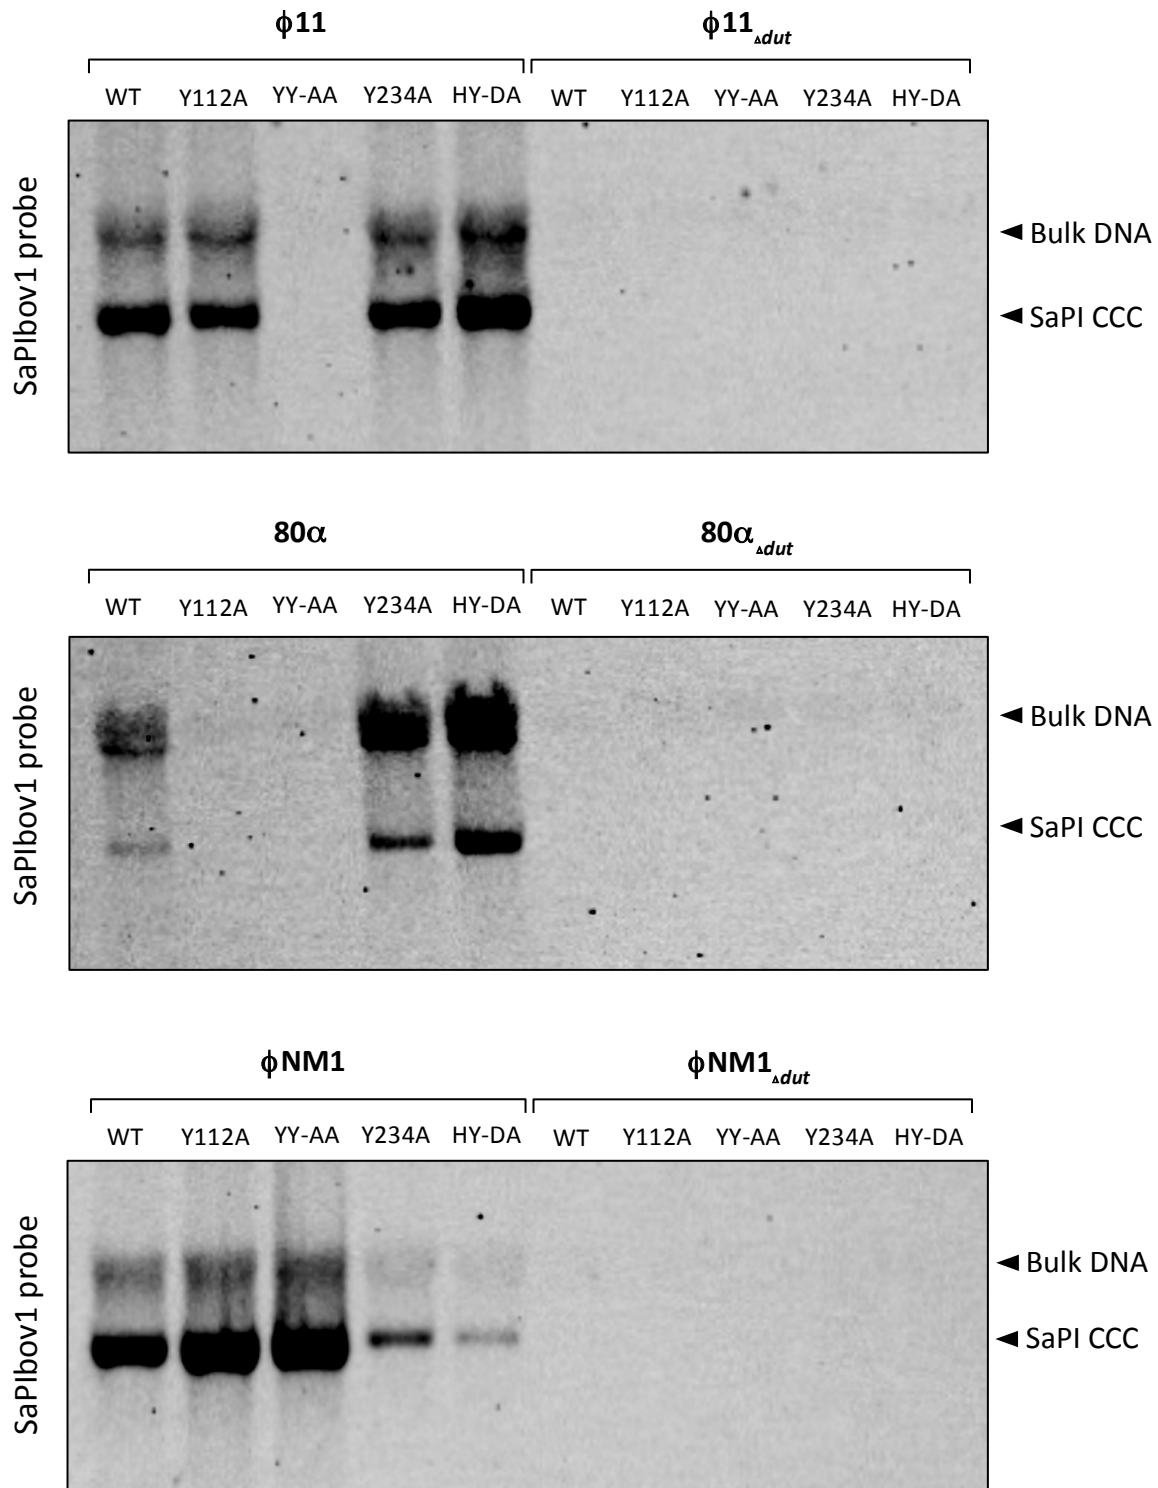

**Supplementary Figure 8. *In vivo* effects of *Stl* mutations on SaPIbov1 excision and replication following helper phage activation.** Strains JP6774, JP17043, JP17706, JP18043, and JP17679 containing SaPIbov1<sup>WT</sup>, Stl<sup>Y234A</sup>, Stl<sup>Y112A</sup>, Stl<sup>YY-AA</sup> and Stl<sup>HY-DA</sup> respectively were lysogenised with either phage  $\phi 11$  (trimeric Dut), phage  $80\alpha$  (trimeric Dut), or  $\phi NM1$  (dimeric Dut), or with their  $\Delta dut$  derivatives. Samples were isolated 90 mins post-induction with 2  $\mu\text{g/ml}$  MC and Southern blots were performed using a SaPIbov1 integrase probe. The upper band is 'bulk' DNA, including chromosomal, phage, and replicating SaPI. CCC indicates covalently closed circular SaPI DNA. Source data are provided as a Source Data file.

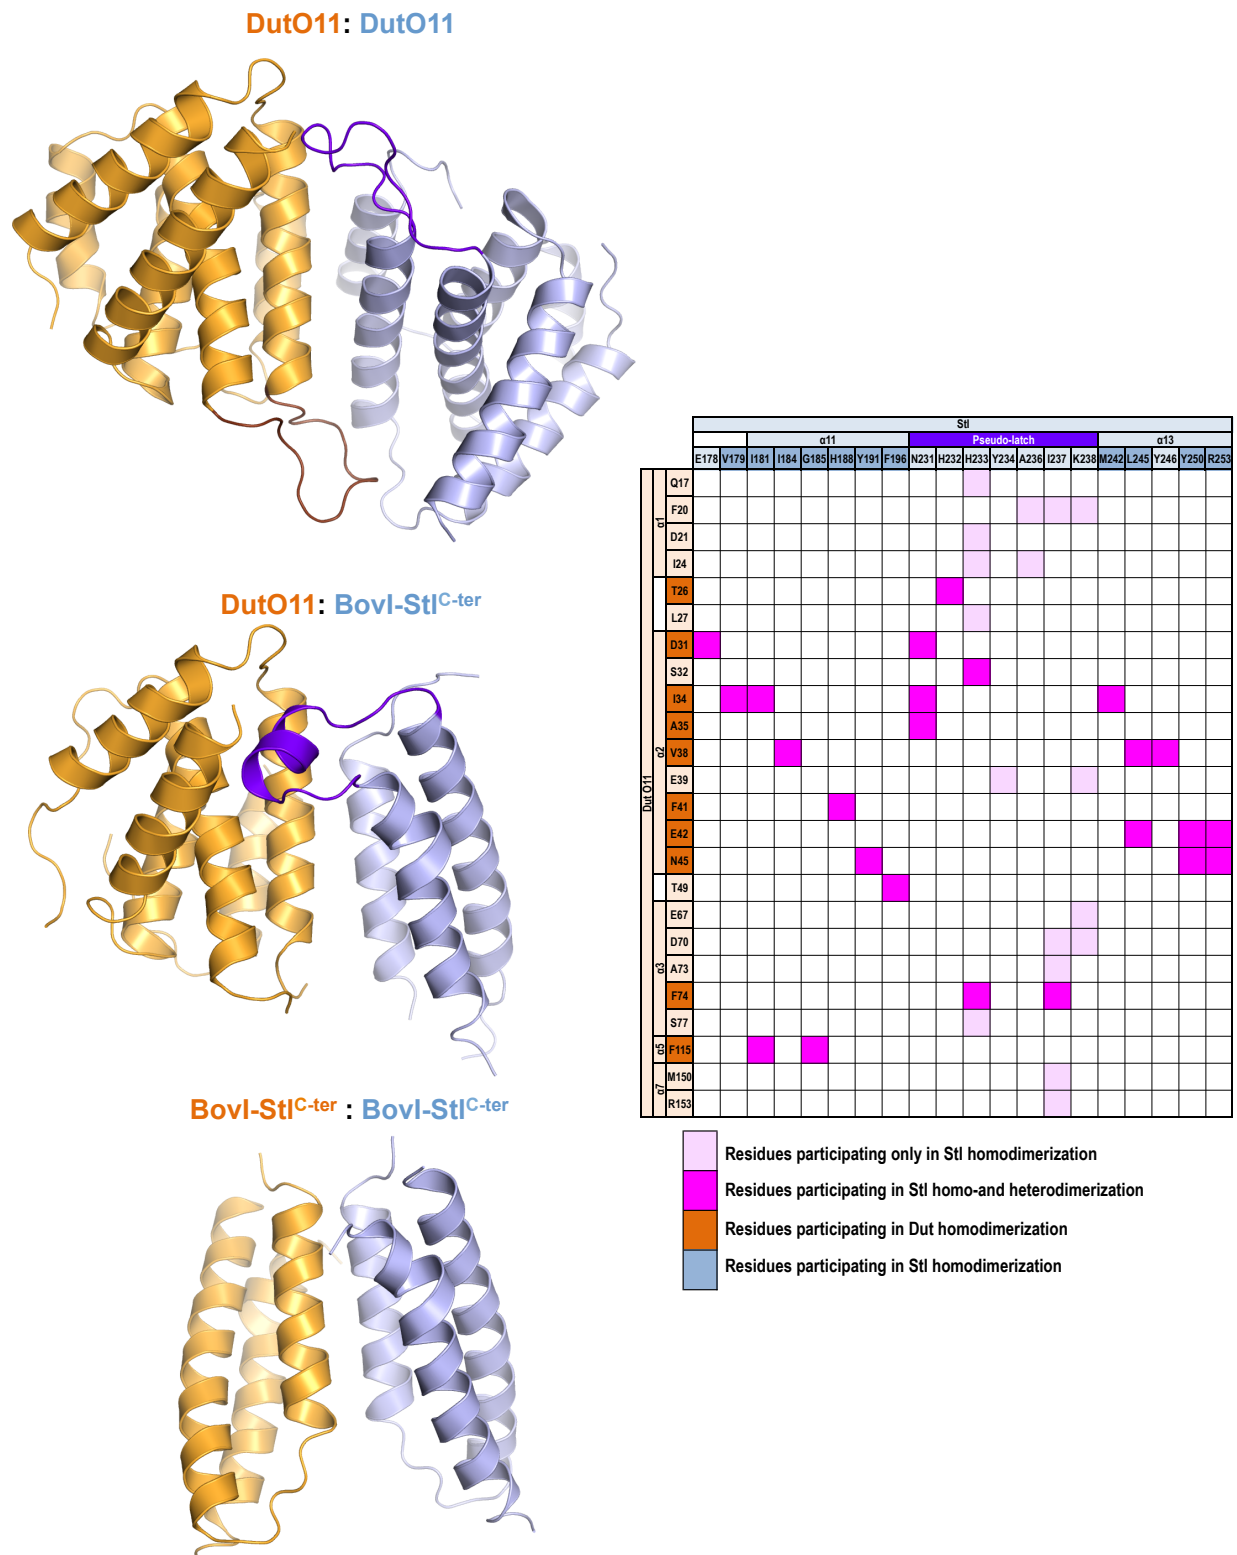

**Supplementary Figure 9. Bovl-Stl<sup>C-ter</sup> mimics the partner protomer in dimeric Duts.** *Left*, Cartoon representation of the structures of Dut $\phi$ O11 (PDB 5MIL; <sup>18</sup>) (top) and Bovl-Stl<sup>C-ter</sup> (bottom) homodimers and a Bovl-Stl<sup>C-ter</sup>-Dut $\phi$ O11 heterodimer (middle) in identical orientation by overlaying one homodimer protomer on the corresponding component on the heterodimer structure. Notice that to form the Bovl-Stl<sup>C-ter</sup>-Dut $\phi$ O11 heterodimer the Bovl-Stl<sup>C-ter</sup> protomer occupies an identical position to the second protomer of the Dut $\phi$ O11 homodimer, mimicking the interaction of this protomer in the complex formation. *Right*, Contact map of Bovl-Stl<sup>C-ter</sup> and Dut $\phi$ O11. The contacts between Dut $\phi$ O11 (Y axis) and Bovl-Stl<sup>C-ter</sup> (X axis) residues are denoted by coloured squares (contacts calculated with Contact Software). Magenta squares indicate contacts between residues that also mediate interactions in the homodimerization of both proteins. Pink squares denote contacts between residues that do not participate in homodimerization interactions of any of the proteins. Brown and blue squares are for contact of residues that also participate in the homodimerization of Dut $\phi$ O11 and Bovl-Stl<sup>C-ter</sup>, respectively. The structural elements where the contacting residues are localized in each protein are indicated in the axis of the map.

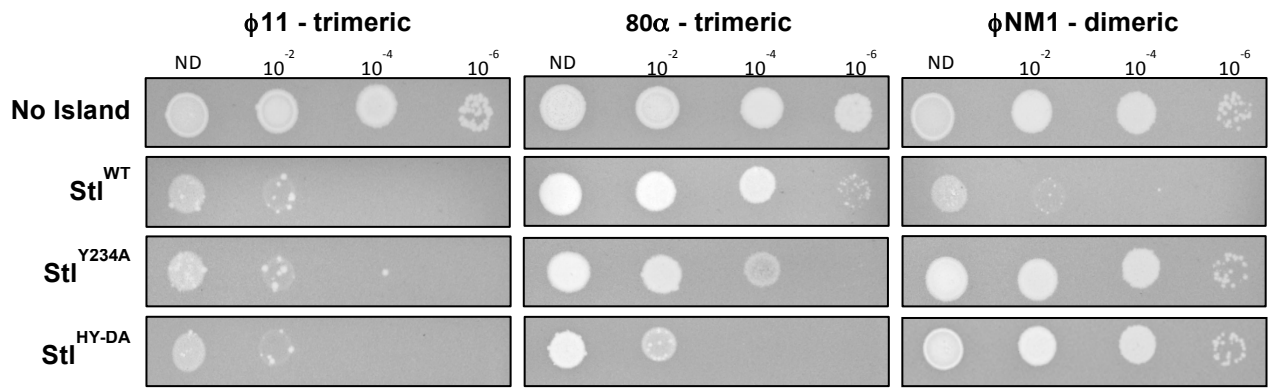

**Supplementary Figure 10.** Phage spotting assay using the trimeric Dut encoding phages  $\phi 11$  and  $80\alpha$ , and dimeric Dut encoding  $\phi NM1$  on bacterial lawns of RN4220 strains either without any SaPI, with the SaPI<sub>bov1</sub>  $Stl^{WT}$ , or with SaPI<sub>bov1</sub> mutants  $Stl^{Y234A}$  or  $Stl^{HY-DA}$ . Serially diluted (10-fold) lysates were spotted on the lawns of indicated *S. aureus*. The phage titre (PFU/ml) used for each spot is indicated on the plate. Source data are provided as a Source Data file.

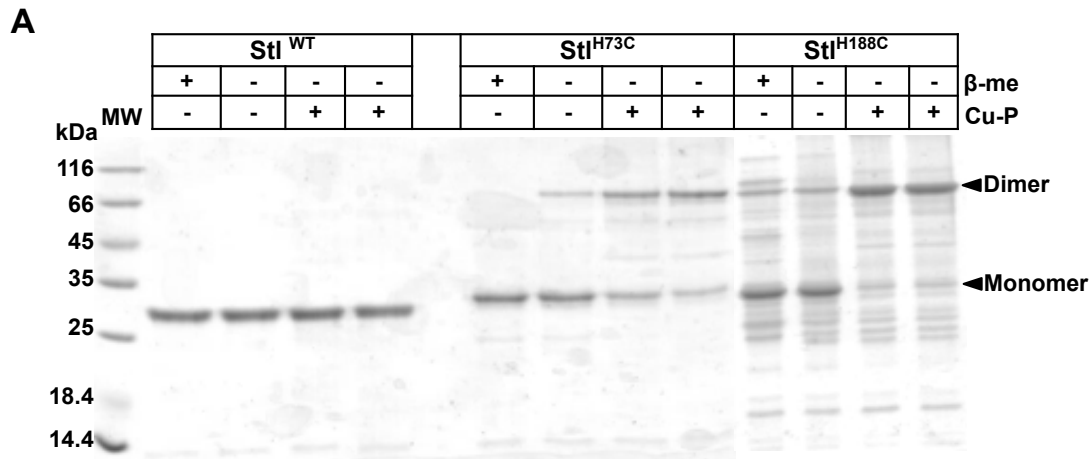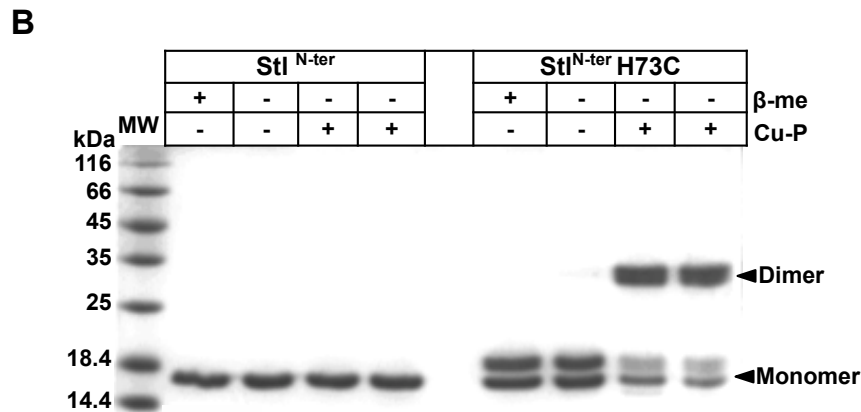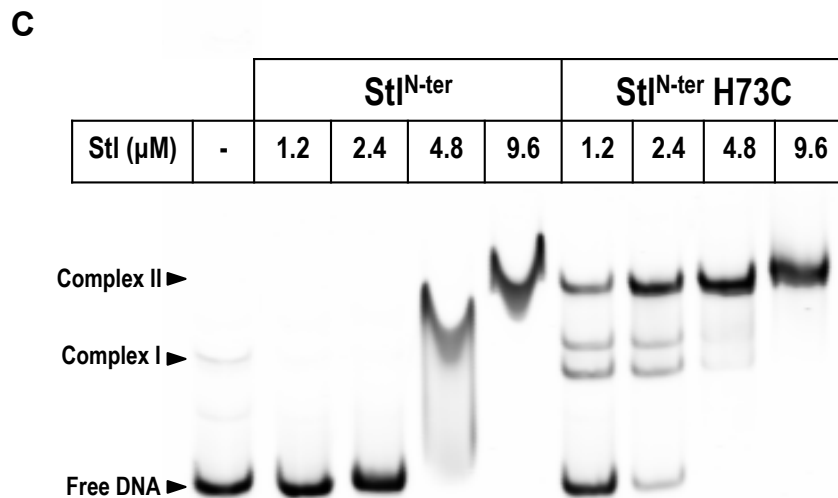

**Supplementary Figure 11. Crosslinked dimers of Stl.** (A) Bovl-Stl His 73 or 188 were mutated to Cys to facilitate the production of disulphide crosslinked dimers. The formation of crosslinked dimers was induced by the addition of the oxidizing reagent copper-phenantroline (Cu-P; 0.5 and 1 mM) and the production of disulphide bound dimers was evaluated by SDS-PAGE in the presence or absence of the reducing agent β-mercaptoethanol (β-me). (B) The formation of dimers induced by the mutation of His73 to Cys was also analysed in the context Bovl-Stl<sup>N-ter</sup> using an identical approach. (C) EMSA assays with Stl<sup>N-ter</sup> and the H73C mutant of this construct show that the forced dimeric H73C mutant produces a shifted band corresponding to the DNA-Stl complex at lower concentrations of Stl protein, supporting a higher affinity for DNA of the Stl H73C mutant. Source data are provided as a Source Data file.

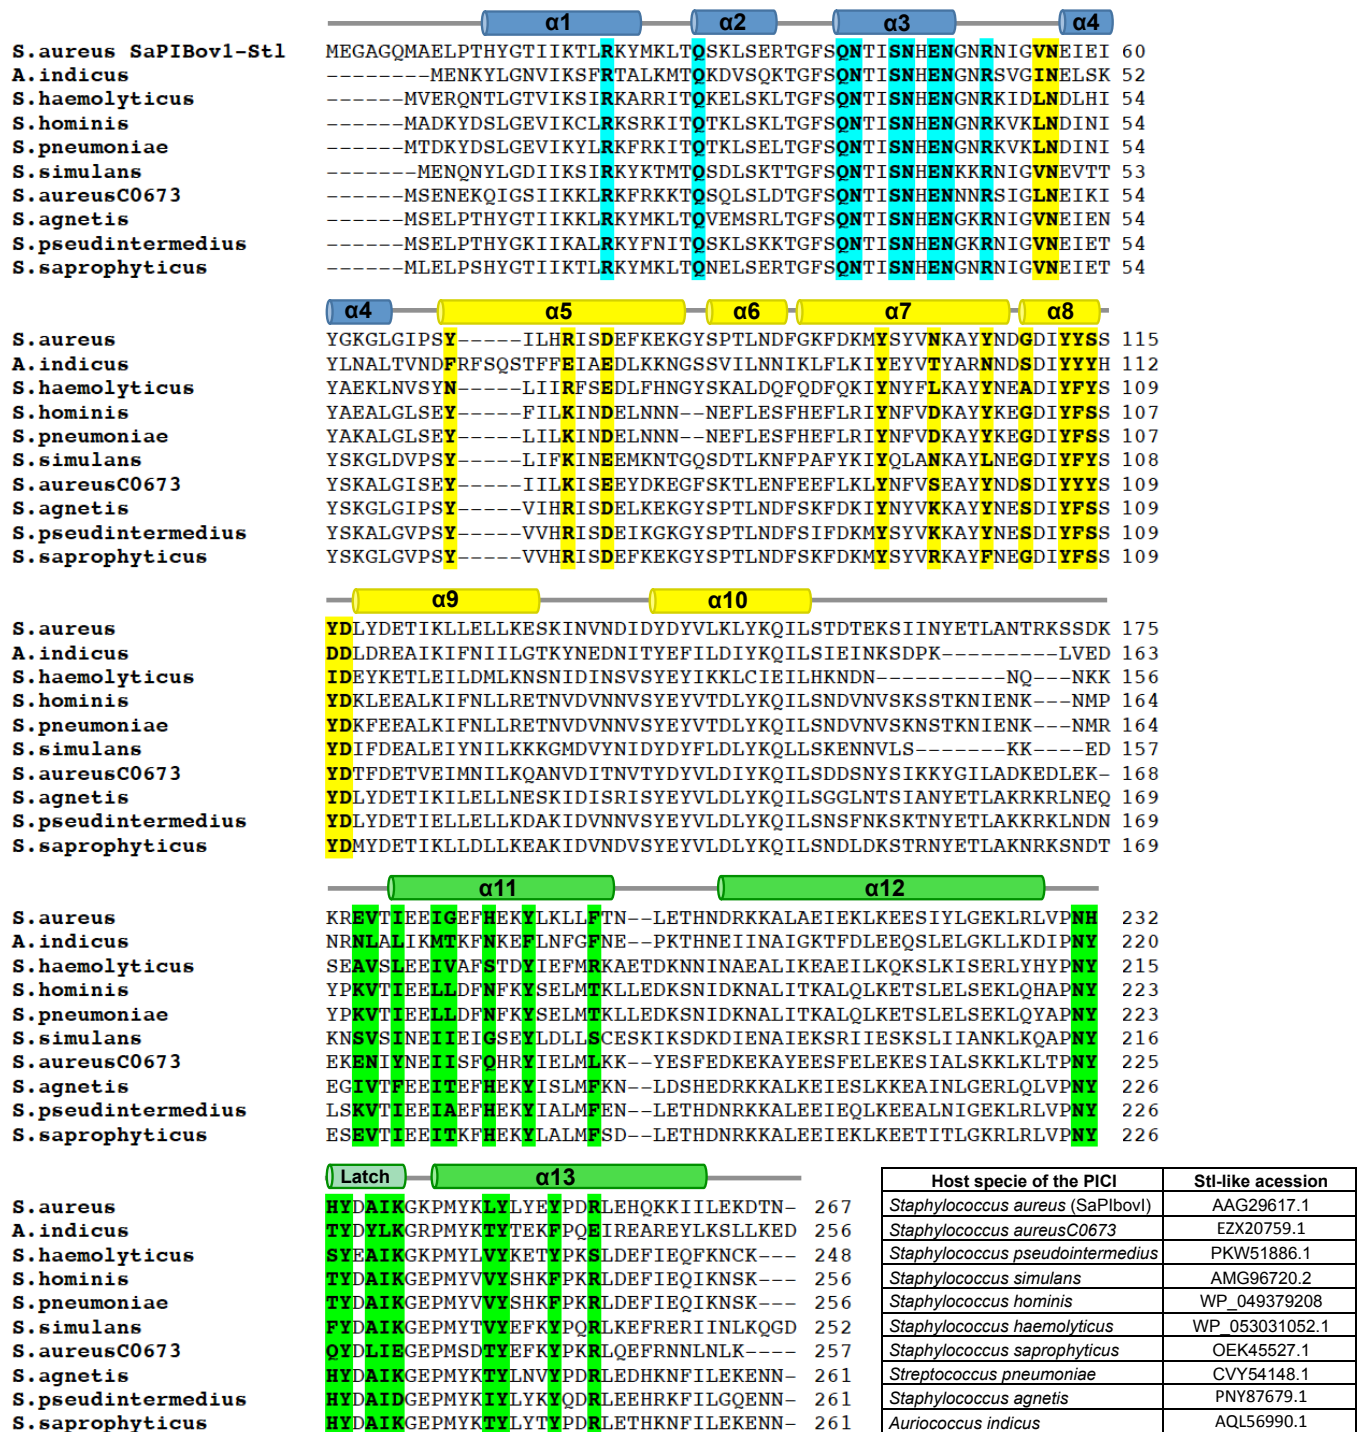

**Supplementary Figure 12. Clustal alignment of SaPIbov1 Stl with homologous Stl repressors from PICIs of different species.** *Auriococcus indicus* Stl sequence is included as external genus within the *Staphylococcaceae* family and *Streptococcus pneumoniae* representing a more distanced species from the *Lactobacillales* order. The residues participating in DNA recognition (highlighted with blue background) are completely conserved, whereas the residues involved in the recognition of trimeric (yellow) or dimeric (green) Duts are partially conserved among Stl repressors. Secondary structural elements are represented above the SaPIbov1 Stl sequence and coloured in blue, yellow and green for the HTH DNA binding, middle and C-terminal domains, respectively. Data base accession code for the corresponding Stl sequences are indicated in the inset table.



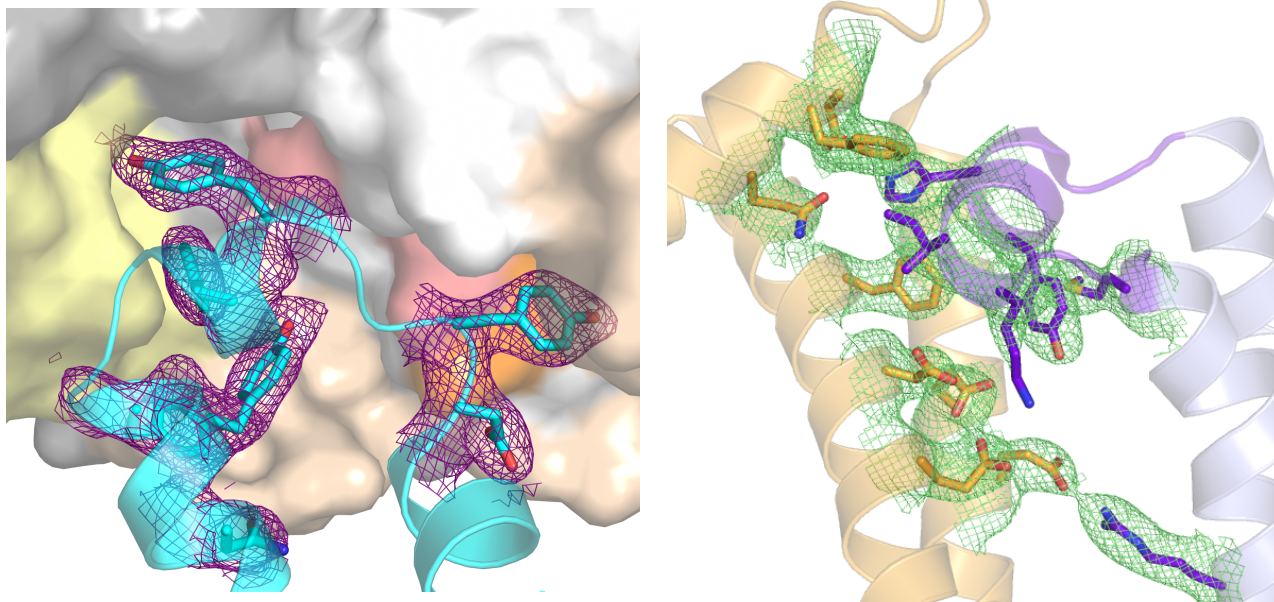

**Supplementary Figure 13. Omit maps for interacting residues in the complexes of StI with trimeric and dimeric Duts.** The electron-density omit map (contour level:  $1\sigma$ ) are shown in (*left*) magenta and (*right*) green around ( $2 \text{ \AA}$ ) the interacting residues of the complexes of StI with trimeric and dimeric Duts showed in Figures 3c and 5c, respectively. Structures are represented as in the corresponding Figures.

Supplementary Table 1. Intersubunit interactions for Stl<sup>C-ter</sup> dimer

| Stl <sup>C-ter</sup> Subunit A |           |           | Stl <sup>C-ter</sup> Subunit B |           |           | Distance (Å) |           |      |
|--------------------------------|-----------|-----------|--------------------------------|-----------|-----------|--------------|-----------|------|
| Structural element             | Residue   | Atom type | Structural element             | Residue   | Atom type |              |           |      |
| α11                            | 181 (ILE) | CG2       | α11                            | 181 (ILE) | CG2       | 3.53         |           |      |
|                                |           | O         | α13                            | 242 (MSE) | CE        | 3.47         |           |      |
|                                |           | CB        | α11                            | 184 (ILE) | CD1       | 3.45         |           |      |
|                                |           | CG2       |                                |           | CD1       | 3.88         |           |      |
|                                |           | 184 (ILE) | CD1                            | α12       | 226 (LEU) | CD2          | 3.81      |      |
|                                | CG2       |           | α11                            | 184 (ILE) | CG2       | 3.55         |           |      |
|                                | CD1       |           |                                |           | CB        | 3.45         |           |      |
|                                | CD1       | 181 (ILE) |                                | CG2       | 3.88      |              |           |      |
|                                | 185 (GLY) | CA        | α13                            | 242 (MSE) | CE        | 3.55         |           |      |
|                                | 188 (HIS) | CB        | α11                            | 188 (HIS) | CG        | 3.50         |           |      |
|                                |           | CB        |                                |           | ND1       | 3.51         |           |      |
|                                |           | CB        |                                |           | CD2       | 3.69         |           |      |
|                                |           | CB        |                                |           | CE1       | 3.69         |           |      |
|                                |           | CB        |                                |           | NE2       | 3.79         |           |      |
|                                |           | CG        |                                |           | CG        | 3.43         |           |      |
|                                |           | CG        |                                |           | CD2       | 3.76         |           |      |
|                                |           | CD2       |                                |           | CD2       | 3.79         |           |      |
|                                | 189 (GLU) | OE1       | α13                            | 250 (TYR) | OH        | 2.19         |           |      |
|                                |           | OE1       |                                |           | 253 (ARG) | NH2          | 3.73      |      |
|                                |           | OE2       |                                | NH2       |           | 2.95         |           |      |
|                                | 191 (TYR) | OH        | α11                            | 196 (PHE) | CZ        | 3.73         |           |      |
|                                | 192 (LEU) | CD1       | α13                            | 250 (TYR) | CE1       | 3.51         |           |      |
|                                |           | CD1       |                                |           | CZ        | 3.80         |           |      |
|                                |           | CD2       | α11                            | 195 (LEU) | CD1       | 3.71         |           |      |
|                                | 193 (LYS) | NZ        | α13                            | 253 (ARG) | NH2       | 3.87         |           |      |
|                                | 195 (LEU) | CD1       | α11                            | 192 (LEU) | CD2       | 3.71         |           |      |
|                                |           |           |                                |           | CD2       | α13          | 253 (ARG) | NH1  |
| CE2                            |           |           |                                |           | CD        |              |           | 3.27 |
| CE2                            |           |           |                                |           | NH1       |              |           | 3.29 |
| CZ                             |           | 191 (TYR) | OH                             | 3.73      |           |              |           |      |
| α12                            | 226 (LEU) | CD2       | α11                            | 181 (ILE) | CD1       | 3.81         |           |      |
| α13                            | 242 (MSE) | CE        |                                | 185 (GLY) | CA        | 3.55         |           |      |
|                                | 245 (LEU) | CD2       |                                | 189 (GLU) | OE1       | 3.64         |           |      |
|                                | 250 (TYR) | OH        |                                |           | OE1       | 2.19         |           |      |
|                                |           | CE1       |                                | 192 (LEU) | CD1       | 3.51         |           |      |
|                                |           | CZ        |                                |           | CD1       | 3.80         |           |      |
|                                | 253 (ARG) | CD        |                                | 196 (PHE) | CE2       | 3.27         |           |      |
|                                |           | NH1       |                                |           | CD2       | 3.37         |           |      |
|                                |           | NH1       |                                |           | CE2       | 3.29         |           |      |
|                                |           | CZ        |                                | 189 (GLU) | OE2       | 3.83         |           |      |
|                                |           | NH2       |                                |           | OE1       | 3.73         |           |      |
|                                |           | NH2       |                                |           | OE2       | 2.95         |           |      |
|                                |           | NH2       |                                |           | 193 (LYS) | NZ           | 3.87      |      |

**Supplementary Table 2. Molecular weight and thermostability of Bovl-Stl WT and mutants**

| <b>Protein</b>              | <b>Molecular Weight (kDa)<sup>a</sup></b> | <b>T<sub>m</sub> (°C)<sup>b</sup></b> |
|-----------------------------|-------------------------------------------|---------------------------------------|
| <b>Stl</b> <sup>WT</sup>    | 61,4 ± 1,23                               | 54,7 ± 0,18                           |
| <b>Stl</b> <sup>R22A</sup>  | 66,3 ± 2,12                               | 55,6 ± 0,11                           |
| <b>Stl</b> <sup>Q29A</sup>  | 65,8 ± 1,58                               | 52,9 ± 0,17                           |
| <b>Stl</b> <sup>S44A</sup>  | 64,1 ± 3,53                               | 55,1 ± 0,10                           |
| <b>Stl</b> <sup>N45A</sup>  | 63,4 ± 3,74                               | 55,4 ± 0,08                           |
| <b>Stl</b> <sup>E47A</sup>  | 66,7 ± 1,93                               | 54,6 ± 0,12                           |
| <b>Stl</b> <sup>N48A</sup>  | 70,2 ± 1,26                               | 54,1 ± 0,19                           |
| <b>Stl</b> <sup>R51A</sup>  | 65,1 ± 1,37                               | 54,8 ± 0,16                           |
| <b>Stl</b> <sup>R74A</sup>  | 69,0 ± 2,21                               | 50,8 ± 0,22                           |
| <b>Stl</b> <sup>Y112A</sup> | 68,6 ± 1,99                               | 54,8 ± 0,18                           |
| <b>Stl</b> <sup>Y113A</sup> | 68,8 ± 1,38                               | 55,5 ± 0,09                           |
| <b>Stl</b> <sup>YY-AA</sup> | 69,4 ± 2,91                               | 58,1 ± 0,24                           |
| <b>Stl</b> <sup>Y116A</sup> | 72,7 ± 4,29                               | 55,9 ± 0,16                           |

<sup>a</sup>Molecular weight of each protein was calculated by SEC-MALS

<sup>b</sup>Thermostability of each protein was calculate by Thermofluor

Supplementary Table 3. Intermolecular interactions for Stl<sup>N-ter</sup> – Dut  $\phi$ 11 complex

| Stl <sup>N-ter</sup>    |            |                       | Dut $\phi$ 11          |                       |           |              |      |
|-------------------------|------------|-----------------------|------------------------|-----------------------|-----------|--------------|------|
| Structural element      | Residue    | Atom type             | Structural element     | Residue               | Atom type | Distance (Å) |      |
| $\alpha$ 4              | 55 (VAL)   | CB                    | $\beta$ 11             | 149 (GLU)             | CD        | 3.89         |      |
|                         | 56 (ASN)   | OD1                   |                        |                       | N         | 2.85         |      |
|                         |            | ND2                   |                        |                       | O         | 2.85         |      |
| $\alpha$ 5              | 70 (TYR)   | OH                    | L $\beta$ 1 $\beta$ 2  | 20 (ASN)              | ND2       | 3.72         |      |
|                         |            | CB                    |                        | 18 (GLU)              | CD        | 3.46         |      |
|                         | 74 (ARG)   | NH1                   |                        |                       | CG        | 3.78         |      |
|                         |            | OE1                   |                        |                       | 2.41      |              |      |
|                         | 77 (ASP)   | OD1                   |                        |                       | OE2       | 3.39         |      |
|                         |            | OD2                   |                        | CD                    | 3.27      |              |      |
| $\alpha$ 6              | 98 (TYR)   | OH                    |                        | 20 (ASN)              | OD1       |              | 3.11 |
|                         | 102 (ASN)  | OD1                   |                        |                       |           |              | 3.49 |
|                         | 106 (TYR)  | CE2                   |                        | 21 (HIS)              | ND1       | CE1          | 3.66 |
|                         |            | CZ                    |                        |                       |           |              | 3.72 |
|                         |            | OH                    |                        |                       |           |              | 3.70 |
|                         |            |                       |                        |                       |           |              | 3.19 |
|                         | $\alpha$ 7 | 109 (GLY)             | N                      | L $\beta$ 7 $\beta$ 8 | 85 (HIS)  | N            | 3.08 |
|                         |            |                       | OH                     | $\beta$ 7             | 84 (TYR)  | OH           | 3.62 |
|                         |            | 112 (TYR)             | CB                     | L $\beta$ 7 $\beta$ 8 | 81 (ASP)  | O            | 3.50 |
|                         |            |                       | CG                     |                       |           | N            | 3.11 |
| CD1                     |            |                       | OD2                    |                       | 2.81      |              |      |
| CD2                     |            |                       | CE1                    |                       | 3.37      |              |      |
| CE2                     |            |                       |                        |                       | 3.27      |              |      |
| CZ                      |            |                       | CD1                    |                       |           | 3.36         |      |
|                         |            |                       |                        |                       |           | 3.51         |      |
|                         |            |                       |                        |                       | 3.47      |              |      |
|                         |            |                       |                        |                       | 3.57      |              |      |
| 113 (TYR)               |            | O                     | $\alpha$ 1             |                       | 65 (SER)  | O            | 3.49 |
|                         | CE2        | $\beta$ 8             | 66 (GLY)               | N                     | 3.55      |              |      |
|                         | CZ         |                       | 69 (SER)               | OG                    | 3.05      |              |      |
|                         | OH         |                       | 89 (GLY)               | N                     | 3.61      |              |      |
|                         | 114 (SER)  | CB                    | $\alpha$ 1             | 70 (TYR)              | CD        | 3.88         |      |
| L $\alpha$ 7 $\alpha$ 8 | O          | 64 (ARG)              |                        | NH1                   | 3.35      |              |      |
|                         | C          |                       | NH2                    | 2.65                  |           |              |      |
|                         | CD1        |                       |                        | 3.54                  |           |              |      |
|                         | CE1        | L $\beta$ 8 $\beta$ 9 | 110 (ILE)              | CG2                   | 3.40      |              |      |
|                         | CE2        |                       | 111 (LYS)              | CE                    | 3.59      |              |      |
|                         |            | CZ                    | L $\beta$ 9 $\beta$ 10 | 133 (LYS)             | N         | 3.81         |      |
| 117 (ASP)               | OD1        | CB                    |                        |                       | 3.96      |              |      |
|                         |            | NZ                    |                        |                       | 2.76      |              |      |
| $\alpha$ 9              | 152 (LEU)  | O                     | $\alpha$ 1             | 70 (TYR)              | NZ        | 3.03         |      |

**Supplementary Table 4. Interactions of dUTP-Mg with residues of trimeric DutΦ11 (PDB 4GV8) and dimeric DutΦO11 (PDB 5MIL) and interactions of these residues with StI in the corresponding complexes.**

| DutΦ11-StI <sup>N-ter</sup> complex |           |                      |
|-------------------------------------|-----------|----------------------|
| DutΦ11-dUTP complex<br>PDB 4GV8     |           |                      |
| dUTP                                | DutΦ11    | StI <sup>N-ter</sup> |
| Structural element                  | Residue   | Residue              |
| P <sub>γ</sub>                      | 20 (ASN)  | 70 (TYR)             |
|                                     | 64 (ARG)  | 116 (TYR)            |
| P <sub>β</sub>                      | 65 (SER)  | 113 (TYR)            |
| P <sub>α</sub>                      |           |                      |
| Deoxyribose                         |           |                      |
| Uracil                              |           |                      |
| P <sub>β</sub>                      | 66 (GLY)  |                      |
| Uracil                              | 78 (GLY)  | -                    |
| Deoxyribose                         | 79 (LYS)  | 112 (TYR)            |
| Uracil                              | 80 (ILE)  |                      |
| Deoxyribose                         | 81 (ASP)  |                      |
| P <sub>α</sub>                      |           |                      |
| Deoxyribose                         | 84 (TYR)  | 109 (GLY)            |
| Uracil                              |           | 112 (TYR)            |
|                                     | 89 (GLY)  | Y113 (TYR)           |
| P <sub>α</sub>                      | 136 (GLN) | -                    |

| DutΦ11-StI <sup>C-ter</sup> complex |           |                      |
|-------------------------------------|-----------|----------------------|
| DutΦO11-dUTP complex<br>PDB 5MIL    |           |                      |
| dUTP                                | DutO11    | StI <sup>C-ter</sup> |
| Structural element                  | Residue   | Residue              |
| Deoxyribose                         | 17 (GLN)  | 233 (HIS)            |
|                                     | 20 (PHE)  | 237 (ILE)            |
|                                     |           | 236 (ALA)            |
|                                     | 21 (ASP)  | 233 (HIS)            |
| 27 (LEU)                            |           |                      |
| Mg ion                              | 39 (GLU)  | 238 (LYS)            |
|                                     |           | 234 (TYR)            |
| P <sub>γ</sub>                      | 42 (GLU)  | 245 (LEU)            |
| Mg ion                              |           |                      |
| P <sub>γ</sub>                      |           |                      |
| Mg ion                              |           |                      |
| P <sub>β</sub>                      |           |                      |
| P <sub>γ</sub>                      |           |                      |
| Mg ion                              |           |                      |
|                                     |           |                      |
|                                     |           |                      |
|                                     |           |                      |
| P <sub>γ</sub>                      | 45 (ASN)  | 191 (TYR)            |
|                                     |           | 250 (TYR)            |
|                                     |           | 253 (ARG)            |
| Mg ion                              | 67 (GLU)  | 238 (LYS)            |
| Deoxyribose                         | 70 (ASP)  | 237 (ILE)            |
| Mg ion                              |           |                      |
| Deoxyribose                         |           |                      |
| P <sub>β</sub>                      |           |                      |
| Mg ion                              |           | 238 (LYS)            |
| Deoxyribose                         | 73 (ALA)  | 237 (ILE)            |
| Deoxyribose                         | 74 (PHE)  | 237 (ILE)            |
| Uracil                              |           |                      |
| Uracil                              |           |                      |
| Deoxyribose                         |           |                      |
| Deoxyribose                         | 153 (ASN) | 237 (ILE)            |

**Supplementary Table 5. Effect of Stl mutations on SaPIbov1 titre.**

| Dut family | Helper phage         | SaPI titre <sup>a</sup> |                      |                      |                      |                      |
|------------|----------------------|-------------------------|----------------------|----------------------|----------------------|----------------------|
|            |                      | Stl <sup>WT</sup>       | Stl <sup>Y112A</sup> | Stl <sup>YY-AA</sup> | Stl <sup>Y234A</sup> | Stl <sup>HY-DA</sup> |
| Trimeric   | φ11                  | 10.06                   | 9.81                 | 2.38****             | 9.97                 | 10.11                |
|            | φ11 <sub>Δdut</sub>  | 2.35****                | 2.37****             | 2.49****             | 2.54****             | 2.82****             |
| Trimeric   | 80α                  | 8.05                    | 1.63****             | 1.71****             | 8.60                 | 9.02*                |
|            | 80α <sub>Δdut</sub>  | 1.87****                | 1.89****             | 1.87****             | 1.90****             | 2.01****             |
| Dimeric    | φNM1                 | 9.40                    | 9.90                 | 9.76                 | 7.94***              | 7.61****             |
|            | φNM1 <sub>Δdut</sub> | 2.91****                | 2.85****             | 2.82****             | 2.85****             | 2.97****             |

<sup>a</sup>Numbers refer to the log<sub>10</sub> number of transductants in RN4220 recipient per 10<sup>9</sup> phage particles. The means of results from three independent experiments are presented. Variation was within ±5% in all cases.

A 2-way ANOVA with Tukey's multiple comparisons test was performed to compare mean differences between the phage<sub>dut+</sub> Stl<sup>WT</sup> control and the mutants for each phage and Stl type. Significant adjusted *p* values were as follows: φ11 Stl<sup>YY-AA</sup> = <0.0001\*\*\*\*, φ11<sub>Δdut</sub> Stl<sup>WT</sup> = <0.0001\*\*\*\*, φ11<sub>Δdut</sub> Stl<sup>Y112A</sup> = <0.0001\*\*\*\*, φ11<sub>Δdut</sub> Stl<sup>YY-AA</sup> = <0.0001\*\*\*\*, φ11<sub>Δdut</sub> Stl<sup>Y234A</sup> = <0.0001\*\*\*\*, φ11<sub>Δdut</sub> Stl<sup>HY-DA</sup> = <0.0001\*\*\*\*; 80α Stl<sup>Y112A</sup> = <0.0001\*\*\*\*, 80α Stl<sup>YY-AA</sup> = <0.001\*\*\*\*, 80α Stl<sup>HY-DA</sup> = 0.024, 80α<sub>Δdut</sub> Stl<sup>WT</sup> = <0.0001\*\*\*\*, 80α<sub>Δdut</sub> Stl<sup>Y112A</sup> = <0.0001\*\*\*\*, 80α<sub>Δdut</sub> Stl<sup>YY-AA</sup> = <0.0001\*\*\*\*, 80α<sub>Δdut</sub> Stl<sup>Y234A</sup> = <0.0001\*\*\*\*, 80α<sub>Δdut</sub> Stl<sup>HY-DA</sup> = <0.0001; φNM1 Stl<sup>Y234A</sup> = 0.0002\*\*\*, φNM1 Stl<sup>HY-DA</sup> = <0.0001\*\*\*\*; φNM1<sub>Δdut</sub> Stl<sup>WT</sup> = <0.0001\*\*\*\*, φNM1<sub>Δdut</sub> Stl<sup>Y112A</sup> = <0.0001\*\*\*\*, φNM1<sub>Δdut</sub> Stl<sup>YY-AA</sup> = <0.0001\*\*\*\*, φNM1<sub>Δdut</sub> Stl<sup>Y234A</sup> = <0.0001\*\*\*\*, φNM1<sub>Δdut</sub> Stl<sup>HY-DA</sup> = <0.0001\*\*\*\*, all other values were not significant.

Supplementary Table 6. Intermolecular interactions for Stl<sup>C-ter</sup> – Dut  $\phi$ O11

| Stl <sup>C-ter</sup> |           |            | Dut $\phi$ O11     |            |            |            |          |      |
|----------------------|-----------|------------|--------------------|------------|------------|------------|----------|------|
| Structural element   | Residue   | Atom Type  | Structural element | Residue    | Atom Type  | Distance   |          |      |
| $\alpha$ 11          | 178 (GLU) | OE2        | $\alpha$ 2         | 31 (ASP)   | OD1        | 3.49       |          |      |
|                      | 179 (VAL) | O          |                    | 34 (ILE)   | CD1        | 3.80       |          |      |
|                      | 181 (ILE) | CG1        |                    |            | $\alpha$ 5 | 115 (PHE)  | CG1      | 3.59 |
|                      |           | CG2        | CE1                | 3.57       |            |            |          |      |
|                      | 184 (ILE) | O          | $\alpha$ 2         | 38 (VAL)   | CZ         | 3.68       |          |      |
|                      | 185 (GLY) | CG2        |                    |            | CG2        | 3.88       |          |      |
|                      | 188 (His) | 185 (GLY)  | CA                 | $\alpha$ 5 | 115 (PHE)  | CZ         | 3.85     |      |
|                      |           | 188 (His)  | CG                 | $\alpha$ 2 | 41 (PHE)   | CB         | 3.87     |      |
|                      |           |            | ND1                |            |            | CB         | 3.59     |      |
|                      |           |            | CB                 |            |            | CG         | 3.52     |      |
|                      |           |            | CG                 |            |            | CG         | 3.81     |      |
|                      |           |            | CB                 |            |            | CD1        | 3.81     |      |
|                      |           |            | CB                 |            |            | CD2        | 3.59     |      |
|                      |           |            | CG                 |            |            | CD2        | 3.73     |      |
|                      |           | 191 (TYR)  | CE2                |            |            | 45 (ASN)   | OD1      | 3.14 |
|                      |           | OH         | OD1                |            |            |            | 3.83     |      |
|                      | 196 (PHE) | CE1        | 49 (THR)           |            |            | C          | 3.49     |      |
|                      |           | CZ         |                    | C          | 3.84       |            |          |      |
|                      |           | CE1        |                    | O          | 3.61       |            |          |      |
|                      | latch     | 231 (ASN)  | CG                 | $\alpha$ 2 | 31 (ASP)   | CB         | 3.57     |      |
| OD1                  |           |            | CB                 |            |            | 3.34       |          |      |
| ND2                  |           |            | CB                 |            |            | 3.50       |          |      |
| ND2                  |           |            | CA                 |            |            | 3.55       |          |      |
| ND2                  |           |            | C                  |            |            | 3.59       |          |      |
| CG                   |           |            | O                  |            |            | 3.73       |          |      |
| OD1                  |           |            | O                  |            |            | 3.69       |          |      |
| ND2                  |           |            | O                  |            |            | 2.93       |          |      |
| ND2                  |           |            | OD1                |            |            | 3.77       |          |      |
| ND2                  |           |            | 34 (ILE)           |            |            | CB         | 3.79     |      |
| ND2                  |           |            | 35 (ALA)           |            |            | N          | 3.76     |      |
| 232 (HIS)            |           |            | ND1                |            |            | $\alpha$ 1 | 26 (THR) | CB   |
|                      |           | CB         | OG1                | 3.25       |            |            |          |      |
|                      |           | CG         | OG1                | 3.05       |            |            |          |      |
|                      |           | ND1        | OG1                | 2.57       |            |            |          |      |
|                      |           | CE1        | OG1                | 3.43       |            |            |          |      |
|                      |           | ND1        | CG2                | 3.74       |            |            |          |      |
|                      |           | CE1        | CG2                | 3.82       |            |            |          |      |
|                      |           | CG         | CD1                | 3.67       |            |            |          |      |
|                      |           | CD2        | 27 (LEU)           | CD1        | 3.59       |            |          |      |
|                      |           | NE2        | CD1                | 3.87       |            |            |          |      |
| 233 (HIS)            |           | ND1        | $\alpha$ 3         | 32 (SER)   | OG         | 3.37       |          |      |
|                      |           | CE1        |                    | 17 (GLN)   | NE2        | 3.58       |          |      |
|                      |           | NE2        |                    | NE2        | 3.43       |            |          |      |
|                      |           | NE2        |                    | 21 (ASP)   | CG         | 3.34       |          |      |
|                      |           | NE2        |                    |            | OD1        | 3.05       |          |      |
|                      |           | CE1        |                    |            | OD2        | 3.44       |          |      |
|                      |           | NE2        |                    |            | OD2        | 3.16       |          |      |
|                      |           | CD2        |                    | 24 (ILE)   | CD1        | 3.43       |          |      |
|                      |           | ND1        |                    | 74 (PHE)   | CD1        | 3.35       |          |      |
|                      | CE1       | CD1        |                    |            | 3.46       |            |          |      |
| O                    | CE1       | 3.75       |                    |            |            |            |          |      |
| ND1                  | CE1       | 3.38       |                    |            |            |            |          |      |
| CE1                  | CE1       | 3.68       |                    |            |            |            |          |      |
| CE1                  | 77 (SER)  | CB         | 3.70               |            |            |            |          |      |
| CE1                  | OG        | 3.55       |                    |            |            |            |          |      |
| 234 (TYR)            | CE2       | $\alpha$ 2 | 39 (GLU)           | OE2        | 3.45       |            |          |      |
|                      | OH        |            |                    | OE2        | 3.71       |            |          |      |

|           |             |           |            |            |           |          |      |
|-----------|-------------|-----------|------------|------------|-----------|----------|------|
|           | 236 (ALA)   | O         | $\alpha 1$ | 20 (PHE)   | CE2       | 3.74     |      |
|           |             | CB        |            |            | CE2       | 3.85     |      |
|           |             | O         |            |            | CZ        | 3.45     |      |
|           | 237 (ILE)   | CB        |            | $\alpha 3$ | 24 (ILE)  | CD1      | 3.63 |
|           |             | CD1       |            |            | 20 (PHE)  | CD2      | 3.62 |
|           |             | CD1       |            |            |           | CE2      | 3.59 |
|           |             | O         | 70 (ASP)   |            |           | OD1      | 3.78 |
|           |             | CG2       |            |            | OD1       | 3.86     |      |
|           |             | CG2       | 74 (PHE)   |            | CB        | 3.83     |      |
|           |             | CB        |            | CZ         | 3.73      |          |      |
|           |             | CB        |            | CE1        | 3.80      |          |      |
|           |             | CG1       |            | CE1        | 3.48      |          |      |
|           |             | 238 (LYS) | CD1        | $\alpha 7$ | 150 (MET) | CE       | 3.84 |
|           |             |           | CG         |            | 153 (ASN) | O        | 3.82 |
|           | OD1         |           | O          |            |           | 3.76     |      |
|           | ND2         |           | O          | 3.31       |           |          |      |
|           | 238 (LYS)   |           | CE         | $\alpha 2$ |           | 39 (GLU) | CD   |
|           |             |           | NZ         |            | OE1       |          | 3.87 |
|           |             |           | CE         | $\alpha 3$ | 67 (GLU)  | OE2      | 3.20 |
|           |             | NZ        | CD         |            |           | 3.72     |      |
|           |             | NZ        | OE1        |            |           | 3.73     |      |
|           |             | CD        | OE1        |            |           | 3.30     |      |
|           | CE          | 70 (ASP)  | OE2        | 3.40       |           |          |      |
|           | CE          |           | OD2        | 3.75       |           |          |      |
|           | $\alpha 13$ | 242 (MSE) | CE         | $\alpha 2$ | 34 (ILE)  | CG2      | 3.68 |
|           |             | 245 (LEU) | CD2        |            | 38 (VAL)  | CG1      | 3.70 |
|           |             |           | CD2        |            | 42 (GLU)  | OE2      | 3.73 |
| CD1       |             | OE2       | 3.80       |            |           |          |      |
| 246 (TYR) |             | OH        | 38 (VAL)   |            | CG1       | 3.86     |      |
|           |             | OH        |            |            | CG2       | 3.27     |      |
| 250 (TYR) |             | CE2       | 42 (GLU)   |            | OE2       | 3.64     |      |
|           |             | OH        | 45 (ASN)   |            | OE2       | 3.33     |      |
|           |             | OH        |            |            | OD1       | 3.55     |      |
| 253 (ARG) |             | NH1       | $\alpha 2$ |            | 42 (GLU)  | CD       | 3.84 |
|           |             | NH2       |            |            |           | CD       | 3.77 |
|           |             | CZ        |            |            |           | OE1      | 3.18 |
|           |             | NH1       |            |            |           | OE1      | 3.03 |
|           |             | NH2       |            |            |           | OE1      | 2.53 |
|           |             | NH1       |            |            |           | 45 (ASN) | ND2  |



**Supplementary Table 7. Bacterial strains used in this study.**

| Strains      | Description                                                      | Reference     |
|--------------|------------------------------------------------------------------|---------------|
| DH5 $\alpha$ | Host for DNA cloning                                             |               |
| RN4220       | Restriction-defective derivative of RN450                        | <sup>19</sup> |
| BL21 (DE3)   | <i>E. coli</i> expression strain                                 | Stratagene    |
| Rosetta2     | <i>E. coli</i> expression strain                                 | Novagen       |
| JP6774       | RN4220 $\Delta$ <i>spa</i> SaPI <sub>bov1</sub> <i>tst::tetM</i> | <sup>20</sup> |
| JP12666      | RN4220 $\phi$ NM1                                                | This work     |
| RN10616      | RN4220 80 $\alpha$                                               | <sup>21</sup> |
| JP8487       | RN4220 $\phi$ 11                                                 | This work     |
| JP10280      | JP6774 pJP1927                                                   | <sup>2</sup>  |
| JP14649      | JP6774 pJP1928                                                   | <sup>2</sup>  |
| JP11742      | JP6774 pJP2040                                                   | <sup>2</sup>  |
| JP15291      | JP6774 pCN51                                                     | <sup>2</sup>  |
| JP18042      | JP6774 pJP653                                                    | This work     |
| JP19591      | JP6774 $\phi$ NM1                                                | This work     |
| JP19593      | JP6774 $\phi$ NM1 <sub>.dut</sub>                                | This work     |
| JP19592      | JP6774 $\phi$ 11                                                 | This work     |
| JP19598      | JP6774 $\phi$ 11 <sub>.dut</sub>                                 | This work     |
| JP19785      | JP6774 80 $\alpha$                                               | This work     |
| JP19780      | JP6774 80 $\alpha$ <sub>.dut</sub>                               | This work     |
| JP18043      | JP6774 StI <sup>Y234A</sup>                                      | This work     |
| JP18044      | JP18043 pJP653                                                   | This work     |
| JP18045      | JP18043 pJP1927                                                  | This work     |
| JP18046      | JP18043 pJP1928                                                  | This work     |
| JP18047      | JP18043 pJP2040                                                  | This work     |
| JP18048      | JP18043 pCN51                                                    | This work     |
| JP18049      | JP18043 $\phi$ NM1                                               | This work     |
| JP19596      | JP18043 $\phi$ NM1 <sub>.dut</sub>                               | This work     |
| JP18050      | JP18043 80 $\alpha$                                              | This work     |
| JP19783      | JP18043 80 $\alpha$ <sub>.dut</sub>                              | This work     |
| JP18051      | JP18043 $\phi$ 11                                                | This work     |
| JP19601      | JP18043 $\phi$ 11 <sub>.dut</sub>                                | This work     |
| JP17679      | JP6774 StI <sup>HY-DA</sup>                                      | This work     |
| JP18052      | JP17679 pJP653                                                   | This work     |
| JP18053      | JP17679 pJP1927                                                  | This work     |
| JP18054      | JP17679 pJP1928                                                  | This work     |
| JP18055      | JP17679 pJP2040                                                  | This work     |
| JP18056      | JP17679 pCN51                                                    | This work     |
| JP18057      | JP17679 $\phi$ NM1                                               | This work     |

|         |                                     |           |
|---------|-------------------------------------|-----------|
| JP19597 | JP17679 $\phi$ NM1 <sub>.dut</sub>  | This work |
| JP18058 | JP17679 80 $\alpha$                 | This work |
| JP19784 | JP17679 80 $\alpha$ <sub>.dut</sub> | This work |
| JP18059 | JP17679 $\phi$ 11                   | This work |
| JP19602 | JP17679 $\phi$ 11 <sub>.dut</sub>   | This work |
| JP17043 | JP6774 Stl <sup>Y112A</sup>         | This work |
| JP18060 | JP17043 pJP653                      | This work |
| JP18061 | JP17043 pJP1927                     | This work |
| JP18062 | JP17043 pJP1928                     | This work |
| JP18063 | JP17043 pJP2040                     | This work |
| JP18064 | JP17043 pCN51                       | This work |
| JP18065 | JP17043 $\phi$ NM1                  | This work |
| JP19594 | JP17043 $\phi$ NM1 <sub>.dut</sub>  | This work |
| JP18066 | JP17043 80 $\alpha$                 | This work |
| JP19781 | JP17043 80 $\alpha$ <sub>.dut</sub> | This work |
| JP18067 | JP17043 $\phi$ 11                   | This work |
| JP19599 | JP17043 $\phi$ 11 <sub>.dut</sub>   | This work |
| JP17706 | JP6774 Stl <sup>YYAA</sup>          | This work |
| JP18068 | JP17706 pJP653                      | This work |
| JP18069 | JP17706 pJP1927                     | This work |
| JP18070 | JP17706 pJP1928                     | This work |
| JP18071 | JP17706 pJP2040                     | This work |
| JP18072 | JP17706 pCN51                       | This work |
| JP18073 | JP17706 $\phi$ NM1                  | This work |
| JP19595 | JP17706 $\phi$ NM1 <sub>.dut</sub>  | This work |
| JP18074 | JP17706 80 $\alpha$                 | This work |
| JP19782 | JP17706 80 $\alpha$ <sub>.dut</sub> | This work |
| JP18075 | JP17706 $\phi$ 11                   | This work |
| JP19600 | JP17706 $\phi$ 11 <sub>.dut</sub>   | This work |
| JP19771 | RN4220 pJP2085                      | This work |
| JP19772 | RN4220 pJP2086                      | This work |
| JP19773 | RN4220 pJP2087                      | This work |
| JP19774 | RN4220 pJP2172                      | This work |
| JP19775 | RN4220 pJP2094                      | This work |
| JP19776 | RN4220 pJP2090                      | This work |
| JP19777 | RN4220 pJP2091                      | This work |
| JP19778 | RN4220 pJP2173                      | This work |
| JP19779 | RN4220 pJP2097                      | This work |
| JP14101 | JP12666 pJP2085                     | This work |
| JP15719 | JP12666 pJP2104                     | This work |
| JP14668 | JP12666 pJP2100                     | This work |
| JP14661 | JP12666 pJP2101                     | This work |

|         |                 |           |
|---------|-----------------|-----------|
| JP13910 | JP12666 pJP2105 | This work |
| JP13907 | JP12666 pJP2106 | This work |
| JP17063 | JP12666 pJP2176 | This work |
| JP17064 | JP12666 pJP2177 | This work |
| JP17065 | JP12666 pJP2178 | This work |
| JP14103 | RN10616 pJP2085 | This work |
| JP15718 | RN10616 pJP2104 | This work |
| JP14666 | RN10616 pJP2100 | This work |
| JP14659 | RN10616 pJP2101 | This work |
| JP13911 | RN10616 pJP2105 | This work |
| JP13908 | RN10616 pJP2106 | This work |
| JP17057 | RN10616 pJP2176 | This work |
| JP17058 | RN10616 pJP2177 | This work |
| JP17059 | RN10616 pJP2178 | This work |
| JP14423 | JP8487 pJP2085  | This work |
| JP15717 | JP8487 pJP2104  | This work |
| JP14785 | JP8487 pJP2100  | This work |
| JP14786 | JP8487 pJP2101  | This work |
| JP14424 | JP8487 pJP2105  | This work |
| JP14425 | JP8487 pJP2106  | This work |
| JP17051 | JP8487 pJP2176  | This work |
| JP17052 | JP8487 pJP2177  | This work |
| JP17053 | JP8487 pJP2178  | This work |

**Supplementary Table 8. Plasmids used in this study.**

| Plasmid    | Description                                          | Reference  |
|------------|------------------------------------------------------|------------|
| pPROEX HTa | Expression vector                                    | Invitrogen |
| pLIC-SGC1  | Expression vector                                    | Invitrogen |
| pCN41      | Expression vector                                    | 22         |
| pCN51      | Expression vector                                    | 22         |
| pJP653     | pCN51 3xflag 11 Dut <sup>W1</sup>                    | 20         |
| pJP1927    | pCN51 3xflag ΦNM1 Dut <sup>W1</sup>                  | 2          |
| pJP1928    | pCN51 3xflag ΦO11 Dut <sup>WT</sup>                  | 2          |
| pJP2040    | pCN51 3xflag ΦDI Dut <sup>WT</sup>                   | 2          |
| pJP2085    | pCN41 pInt-20 <sup>WT</sup> -19-18blaZ (SaPIbov1)    | This work  |
| pJP2086    | pCN41 pInt-20 <sup>R22A</sup> -19-18blaZ (SaPIbov1)  | This work  |
| pJP2087    | pCN41 pInt-20 <sup>Q29A</sup> -19-18blaZ (SaPIbov1)  | This work  |
| pJP2172    | pCN41 pInt-20 <sup>S44A</sup> -19-18blaZ (SaPIbov1)  | This work  |
| pJP2094    | pCN41 pInt-20 <sup>N45A</sup> -19-18blaZ (SaPIbov1)  | This work  |
| pJP2090    | pCN41 pInt-20 <sup>E47A</sup> -19-18blaZ (SaPIbov1)  | This work  |
| pJP2091    | pCN41 pInt-20 <sup>N48A</sup> -19-18blaZ (SaPIbov1)  | This work  |
| pJP2173    | pCN41 pInt-20 <sup>R51A</sup> -19-18blaZ (SaPIbov1)  | This work  |
| pJP2104    | pCN41 pInt-20 <sup>Y112A</sup> -19-18blaZ (SaPIbov1) | This work  |
| pJP2100    | pCN41 pInt-20 <sup>Y113A</sup> -19-18blaZ (SaPIbov1) | This work  |
| pJP2101    | pCN41 pInt-20 <sup>Y116A</sup> -19-18blaZ (SaPIbov1) | This work  |
| pJP2105    | pCN41 pInt-20 <sup>Y106A</sup> -19-18blaZ (SaPIbov1) | This work  |
| pJP2106    | pCN41 pInt-20 <sup>YY-AA</sup> -19-18blaZ (SaPIbov1) | This work  |
| pJP2176    | pCN41 pInt-20 <sup>Y234A</sup> -19-18blaZ (SaPIbov1) | This work  |
| pJP2177    | pCN41 pInt-20 <sup>HY-DA</sup> -19-18blaZ (SaPIbov1) | This work  |
| pJP2178    | pCN41 pInt-20 <sup>GGGS</sup> -19-18blaZ (SaPIbov1)  | This work  |
| pJP2097    | pCN41 pInt-20 <sup>R74A</sup> -19-18blaZ (SaPIbov1)  | This work  |
| pJP666     | pET28a Dut11                                         | 23         |
| pJP753     | pET28a Dut80a                                        | 23         |
| pJP2046    | pET28a DutDI                                         | 2          |
| pJP2048    | pET28a DutO11                                        | 18         |
| pETNKI-StI | pETNKI 1.10 StI <sup>WT</sup>                        | 15         |
| pAM1       | pETNKI 1.10 StI <sup>N-ter</sup>                     | This work  |
| pAM2       | pETNKI 1.1 StI <sup>C-ter</sup>                      | This work  |
| pAM3       | pLIC-SGC1 StI <sup>R22A</sup>                        | This work  |
| pAM4       | pLIC-SGC1 StI <sup>Q29A</sup>                        | This work  |
| pAM5       | pLIC-SGC1 StI <sup>S44A</sup>                        | This work  |
| pAM6       | pLIC-SGC1 StI <sup>N45A</sup>                        | This work  |
| pAM7       | pLIC-SGC1 StI <sup>E47A</sup>                        | This work  |
| pAM8       | pLIC-SGC1 StI <sup>N48A</sup>                        | This work  |
| pAM9       | pLIC-SGC1 StI <sup>R51A</sup>                        | This work  |
| pAM10      | pLIC-SGC1 StI <sup>H73C</sup>                        | This work  |

|       |                                      |           |
|-------|--------------------------------------|-----------|
| pAM11 | pLIC-SGC1 Stl <sup>R74A</sup>        | This work |
| pAM12 | pLIC-SGC1 Stl <sup>Y112A</sup>       | This work |
| pAM13 | pLIC-SGC1 Stl <sup>Y113A</sup>       | This work |
| pAM14 | pLIC-SGC1 Stl <sup>YY-AA</sup>       | This work |
| pAM15 | pLIC-SGC1 Stl <sup>Y116A</sup>       | This work |
| pAM16 | pLIC-SGC1 Stl <sup>H188C</sup>       | This work |
| pAM17 | pLIC-SGC1 Stl <sup>Y234A</sup>       | This work |
| pAM18 | pLIC-SGC1 Stl <sup>HY-DA</sup>       | This work |
| pAM19 | pLIC-SGC1 Stl <sup>GGGS</sup>        | This work |
| pAM20 | pETNKI 1.10 Stl <sup>Nter-H73C</sup> | This work |

**Supplementary Table 9. Oligonucleotide designs used in this study.**

| Plasmid                       | Oligonucleotides          | Sequence                                                                                                                            |
|-------------------------------|---------------------------|-------------------------------------------------------------------------------------------------------------------------------------|
| pJP653                        | orf32-phi80alpha-23mS     | <u>ACGCGTCGAC</u> ATTATGGCAGGTCAAGTTGTCTATAAAATATGAG<br>GAGGAATAGGAAAATGGATTATAAAGATCACGATGGCGATTAT<br>AAAGATCACG                   |
|                               | orf32-phi80alpha-20m      | TATAAAGATCACGATGGCGATTATAAAGATCACGATATCGATT<br>ATAAAGATGATGATGATAAAATGACTAACACATTACAAGTAAG<br>GCTATTATCAGAA                         |
|                               | orf25-phi11-39cB          | <u>CGCGGATCCCTTT</u> ACTACTCCGCTACTTCCG                                                                                             |
| pJP1928<br>pJP1927<br>pJP2040 | dutNM1-1mS                | <u>ACGCGTCGAC</u> ATTATGACGGGTCAAGTTGTCTATAAAATATGAG<br>GAGGCACAGGAAAATGGATTATAAAGATCACGATGGCGATTAT<br>AAAGATC                      |
|                               | dutNM1-2m                 | CACGATGGCGATTATAAAGATCACGATATCGATTATAAAGATG<br>ATGATGATAAAATGACTAACACATTAACAATTGATCAG<br><br><u>CGCGGATCCTT</u> ACACGTATCCTTTTCCTGC |
|                               | dut-DI-2cB                | (These plasmids were constructed using the same primers with<br>different templates.)                                               |
| pJP2085                       | SaPIbov1-149cB<br>NY-24mK | <u>CGCGGATCCGAT</u> CAGTACCTAAATATGCG<br><u>CGGGTACCCACT</u> CGGTTATAACCTT                                                          |
| pJP2086*                      | SaPIbov1-orf20-34c        | GTTAATTTTCATGTATTTTGCAAGAGTTTTAATAATTG                                                                                              |
|                               | SaPIbov1-orf20-35m        | CAATTATTA <del>AA</del> ACTCTTGCAA <del>AA</del> TACATGAA <del>AT</del> TAAC                                                        |
| pJP2087*                      | SaPIbov1-orf20-36c        | CACTCAATTTGCTTGCAGTTAATTTTCATG                                                                                                      |
|                               | SaPIbov1-orf20-37m        | CATGAAATTA <del>AA</del> CTGCAAGCAA <del>AT</del> TGAGTG                                                                            |
| pJP2172*                      | SaPIbov1-orf20-80c        | GCCGTTCTCGTGATTTGCAATGGTGT <del>TT</del> TGAC                                                                                       |
|                               | SaPIbov1-orf20-81m        | GTCAA <del>AA</del> CACCATTGCAA <del>AT</del> CACGAGA <del>AC</del> CGGC                                                            |
| pJP2094*                      | SaPIbov1-orf-20-60c       | GTTGCCGTTCTCGTGAGCTGAAATGGTGT <del>TT</del> TG                                                                                      |
|                               | SaPIbov1-orf-20-61m       | CAA <del>AA</del> CACCATTTCA <del>AG</del> CTCACGAGA <del>AC</del> CGGCAAC                                                          |
| pJP2090*                      | SaPIbov1-orf20-40c        | GTTTCTGTTGCCGTTCCGCGTGATTTGAAATGG                                                                                                   |
|                               | SaPIbov1-orf20-41m        | CCATTTCAA <del>AT</del> CACGCGAACGGCAACAGAAAC                                                                                       |
| pJP2091*                      | SaPIbov1-orf20-30c        | GTTTCTGTTGCCGGCCTCGTGATTTG                                                                                                          |
|                               | SaPIbov1-orf20-31m        | CAA <del>AT</del> CACGAGGCCGGCAACAGAAAC                                                                                             |
| pJP2173*                      | SaPIbov1-orf20-78c        | CATTTACTCCAATGTTTGCGTTGCCGTTCTCGTG                                                                                                  |
|                               | SaPIbov1-orf20-79m        | CACGAGA <del>AC</del> CGGCAACGCAA <del>AC</del> ATTGGAGTAAATG                                                                       |

|                  |                                            |                                                                                                                                                                              |
|------------------|--------------------------------------------|------------------------------------------------------------------------------------------------------------------------------------------------------------------------------|
| pJP2104*         | SaPIbov1-orf20-50c<br>SaPIbov1-orf20-51m   | CGTATGATGAATAAGCAATGTCGCCGTC<br>GACGGCGACATTGCTTATTCATCATACG                                                                                                                 |
| pJP2100*         | SaPIbov1-orf20-52c<br>SaPIbov1-orf20-53m   | CATATAAATCGTATGATGAAGCATAAATGTCGCCGTC<br>GACGGCGACATTTATGCTTCATCATACGATTTATATG                                                                                               |
| pJP2101*         | SaPIbov1-orf20-54c<br>SaPIbov1-orf20-55m   | GTTTCATCATATAAATCGGCTGATGAATAATAAATG<br>CATTTATTATTCATCAGCCGATTTATATGATGAAAC                                                                                                 |
| pJP2105*         | SaPIbov1-orf20-16c<br>SaPIbov1-orf20-15m   | ATAAATGTCGCCGTCATTTGCATAGGCTTTATTAACATAA<br>TTATGTTAATAAAGCCTATGCAAATGACGGCGACATTTAT                                                                                         |
| pJP2106*         | SaPIbov1-orf20-18c<br>SaPIbov1-orf20-17m   | TATAAATCGTATGATGATGCTGCAATGTCGCCGTCATTAT<br>ATAATGACGGCGACATTGCAGCATCATCATACGATTTATA                                                                                         |
| pJP2176*         | SaPIbov1-orf20-90c<br>SaPIbov1-orf20-91m   | CCTTTAATAGCATCAGCATGATGGTTAGGAACC<br>GGTTCCTAACCATCATGCTGATGCTATTAAGG                                                                                                        |
| pJP2177*         | SaPIbov1-orf20-97c<br>SaPIbov1-orf20-96m   | CCTTTAATAGCATCAGCATGATCGTTAGGAACC<br>GGTTCCTAACGATCATGCTGATGCTATTAAGG                                                                                                        |
| pJP2178*         | SaPIbov1-orf20-106c<br>SaPIbov1-orf20-107m | CATTGGGCTACCTCCTCCAGGAACC<br>GGTTCCTGGAGGAGGTAGCCCAATG                                                                                                                       |
| pJP2097*         | SaPIbov1-orf20-42c<br>SaPIbov1-orf20-43m   | CTTTAAACTCATCTGATATCGCGTGTAGAATATAGCTGGG<br>CCCAGCTATATTCTACACGCGATATCAGATGAGTTTAAAG                                                                                         |
| pAM1             | Stl_Nter_STOP_Fw<br>Stl_Nter_STOP_Rv       | CACTGATACATAAAAATCAATAATAAATTACG<br>GAAAGGATTTGTTTGTACAAC                                                                                                                    |
| pAM2             | FwStl1-8_K175-N267<br>RvStlpETNKI1-8       | CAGGGACCCGGTAAAAAAGAGAAGTAACAATAGAAG<br>CGAGGAGAAGCCCGGTTAATTAGTGTCTTTTTCAAGTATG                                                                                             |
| pAM3 to<br>pAM15 | Stl_OFA_Fw<br>Stl_OFA_Rv                   | TACTTCCAATCCATGATGGAAGGAGCTGGTCAAATG<br>TATCCACCTTTACTGTCATTAATTAGTGTCTTTTTCAAGTATG<br>(These plasmids were constructed using the same primers with<br>different templates.) |
| pAM16            | Stl_H188C_Fw<br>Stl_H188C_Rv               | TGGTGAATTTTGCGAAAAATATTTAAACTATTATTC<br>ATTTCTTCTATTGTTACTTCTC                                                                                                               |

| pAM17 to<br>pAM19 | SaPIbov1-orf20-102m<br>SaPIbov1-orf20-103c | TACTTCCAATCCATGATGGAAGGAGCTGGTCAAATGGC<br>TATCCACCTTTACTGTTAATTAGTGTCTTTTTCAAGTATG<br>(These plasmids were constructed using the same primers with<br>different templates.) |
|-------------------|--------------------------------------------|-----------------------------------------------------------------------------------------------------------------------------------------------------------------------------|
| pAM20             | Stl_NterH73C_Fw<br>Stl_NterH73C_Rv         | TATATTCTATGCAGAATATCAGATGAGTTTAAAGAAAAAG<br>CTGGGTATACCTAAACCTTTAC                                                                                                          |
| Probe             | Oligonucleotides                           | Sequence                                                                                                                                                                    |
| <b>SaPIbov1</b>   | SaPIbov1-112mE                             | CCGGAATTCAATTGCTGAGGCAAACTTC                                                                                                                                                |
|                   | SaPIbov1-113cB                             | CGCGGATCCTAATTCTCCACGTCTAAAGC                                                                                                                                               |
| <b>SaPIbov1</b>   | Stl_DNA_BR1                                | AAACATATTCTCACCTCCTCG                                                                                                                                                       |
|                   | Stl_DNA_BR2                                | TAAATCCTGTCCTTTCACTCAA                                                                                                                                                      |



## Supplementary References

- 1 Vertessy, B. G. & Toth, J. Keeping uracil out of DNA: physiological role, structure and catalytic mechanism of dUTPases. *Acc Chem Res* **42**, 97-106, doi:10.1021/ar800114w (2009).
- 2 Donderis, J. *et al.* Convergent evolution involving dimeric and trimeric dUTPases in pathogenicity island mobilization. *PLoS Pathog* **13**, e1006581, doi:10.1371/journal.ppat.1006581 (2017).
- 3 Moroz, O. V. *et al.* Dimeric dUTPases, HisE, and MazG belong to a new superfamily of all-alpha NTP pyrophosphohydrolases with potential "house-cleaning" functions. *J Mol Biol* **347**, 243-255, doi:10.1016/j.jmb.2005.01.030 (2005).
- 4 Barabas, O. *et al.* Catalytic mechanism of alpha-phosphate attack in dUTPase is revealed by X-ray crystallographic snapshots of distinct intermediates, <sup>31</sup>P-NMR spectroscopy and reaction path modelling. *Nucleic Acids Res* **41**, 10542-10555, doi:10.1093/nar/gkt756 (2013).
- 5 Hemsworth, G. R., Gonzalez-Pacanowska, D. & Wilson, K. S. On the catalytic mechanism of dimeric dUTPases. *Biochem J* **456**, 81-88, doi:10.1042/BJ20130796 (2013).
- 6 Leveles, I. *et al.* Structure and enzymatic mechanism of a moonlighting dUTPase. *Acta Crystallogr D Biol Crystallogr* **69**, 2298-2308, doi:10.1107/S0907444913021136 (2013).
- 7 Poornam, G. P., Matsumoto, A., Ishida, H. & Hayward, S. A method for the analysis of domain movements in large biomolecular complexes. *Proteins* **76**, 201-212, doi:10.1002/prot.22339 (2009).
- 8 Pecsí, I. *et al.* Nucleotide pyrophosphatase employs a P-loop-like motif to enhance catalytic power and NDP/NTP discrimination. *Proc Natl Acad Sci U S A* **108**, 14437-14442, doi:10.1073/pnas.1013872108 (2011).
- 9 Holm, L. & Laakso, L. M. Dali server update. *Nucleic Acids Res* **44**, W351-355, doi:10.1093/nar/gkw357 (2016).
- 10 McGeehan, J. E. *et al.* Structural analysis of the genetic switch that regulates the expression of restriction-modification genes. *Nucleic Acids Res* **36**, 4778-4787, doi:10.1093/nar/gkn448 (2008).
- 11 Papp-Kadar, V., Szabo, J. E., Nyiri, K. & Vertessy, B. G. In Vitro Analysis of Predicted DNA-Binding Sites for the StI Repressor of the Staphylococcus aureus SaPIBov1 Pathogenicity Island. *PLoS One* **11**, e0158793, doi:10.1371/journal.pone.0158793 (2016).
- 12 Ball, N. J., McGeehan, J. E., Streeter, S. D., Thresh, S. J. & Kneale, G. G. The structural basis of differential DNA sequence recognition by restriction-modification controller proteins. *Nucleic Acids Res* **40**, 10532-10542, doi:10.1093/nar/gks718 (2012).
- 13 Dodd, I. B., Shearwin, K. E. & Egan, J. B. Revisited gene regulation in bacteriophage lambda. *Curr Opin Genet Dev* **15**, 145-152, doi:10.1016/j.gde.2005.02.001 (2005).
- 14 Lewis, R. J., Brannigan, J. A., Offen, W. A., Smith, I. & Wilkinson, A. J. An evolutionary link between sporulation and prophage induction in the structure of a repressor:anti-repressor complex. *J Mol Biol* **283**, 907-912, doi:10.1006/jmbi.1998.2163 (1998).
- 15 Maiques, E. *et al.* Another look at the mechanism involving trimeric dUTPases in Staphylococcus aureus pathogenicity island induction involves novel players in the party. *Nucleic Acids Res* **44**, 5457-5469, doi:10.1093/nar/gkw317 (2016).

- 16 Szabo, J. E. *et al.* Highly potent dUTPase inhibition by a bacterial repressor protein reveals a novel mechanism for gene expression control. *Nucleic Acids Res* **42**, 11912-11920, doi:10.1093/nar/gku882 (2014).
- 17 Sagendorf, J. M., Berman, H. M. & Rohs, R. DNAproDB: an interactive tool for structural analysis of DNA-protein complexes. *Nucleic Acids Res* **45**, W89-W97, doi:10.1093/nar/gkx272 (2017).
- 18 Bowring, J. *et al.* Pirating conserved phage mechanisms promotes promiscuous staphylococcal pathogenicity island transfer. *Elife* **6**, doi:10.7554/eLife.26487 (2017).
- 19 Krissinel, E. & Henrick, K. Inference of macromolecular assemblies from crystalline state. *J Mol Biol* **372**, 774-797, doi:10.1016/j.jmb.2007.05.022 (2007).
- 20 Tormo-Mas, M. A. *et al.* Moonlighting bacteriophage proteins derepress staphylococcal pathogenicity islands. *Nature* **465**, 779-782, doi:10.1038/nature09065 (2010).
- 21 Ubeda, C. *et al.* Specificity of staphylococcal phage and SaPI DNA packaging as revealed by integrase and terminase mutations. *Mol Microbiol* **72**, 98-108 (2009).
- 22 Charpentier, E. *et al.* Novel cassette-based shuttle vector system for gram-positive bacteria. *Appl Environ Microbiol* **70**, 6076-6085, doi:10.1128/AEM.70.10.6076-6085.2004 (2004).
- 23 Tormo-Mas, M. A. *et al.* Phage dUTPases control transfer of virulence genes by a proto-oncogenic G protein-like mechanism. *Mol Cell* **49**, 947-958, doi:10.1016/j.molcel.2012.12.013 (2013).
